# Statistically consistent divide-and-conquer pipelines for phylogeny estimation using NJMerge

Erin K. Molloy and Tandy Warnow

January 17, 2019

## Abstract

**Background.** Divide-and-conquer methods, which divide the species set into overlapping subsets, construct a tree on each subset, and then combine the subset trees using a supertree method, provide a key algorithmic framework for boosting the scalability of phylogeny estimation methods to large datasets. Yet the use of supertree methods, which typically attempt to solve NP-hard optimization problems, limits the scalability of such approaches.

**Results.** In this paper, we introduce a divide-and-conquer approach that does not require supertree estimation: we divide the species set into pairwise disjoint subsets, construct a tree on each subset using a base method, and then combine the subset trees using a distance matrix. For this merger step, we present a new method, called NJMerge, which is a polynomial-time extension of Neighbor Joining (NJ); thus, NJMerge can be viewed either as a method for improving traditional NJ or as a method for scaling the base method to larger datasets. We prove that NJMerge can be used to create divide-and-conquer pipelines that are statistically consistent under some models of evolution. We also report the results of an extensive simulation study evaluating NJMerge on multi-locus datasets with up to 1000 species. We found that NJMerge sometimes improved the accuracy of traditional NJ and substantially reduced the running time of three popular species tree methods (ASTRAL-III, SVDquartets, and “concatenation” using RAxML) without sacrificing accuracy. Finally, although NJMerge can fail to return a tree, in our experiments, NJMerge failed on only 11 out of 2560 test cases.

**Conclusions.** Theoretical and empirical results suggest that NJMerge is a valuable technique for large-scale phylogeny estimation, especially when computational resources are limited. NJMerge is freely available on Github (<http://github.com/ekmolloy/njmerge>).

## Introduction

Estimating evolutionary trees, called phylogenies, from molecular sequence data is a fundamental problem in computational biology, and building the Tree of Life is a scientific grand challenge. It is also a computational grand challenge, as many of the most accurate phylogeny estimation methods are heuristics for NP-hard optimization problems. Species tree estimation can be further complicated by biological processes (e.g., incomplete lineage

sorting, gene duplication and loss, and horizontal gene transfer) that create heterogeneous evolutionary histories across genomes or “gene tree discordance” [24].

Incomplete lineage sorting, which is modeled by the Multi-Species Coalescent (MSC) model [36, 39], has been shown to present challenges for phylogenomic analyses [11]. In addition, while the standard approach for multi-locus species tree estimation uses maximum likelihood methods (e.g., RAxML) on the concatenated sequence alignment, recent studies have established that even exact algorithms for maximum likelihood are not statistically consistent methods for multi-locus species tree estimation under the MSC model (see [42] for a proof for unpartitioned maximum likelihood and [41] for fully partitioned maximum likelihood).

Because concatenation analyses using maximum likelihood are provably not statistically consistent in the presence of incomplete lineage sorting, new methods have been developed that are provably statistically consistent under the MSC model. Bayesian methods that co-estimate gene trees and species trees (e.g., [15, 35]) are statistically consistent and expected to be the highly accurate; however, such methods are also prohibitively expensive on large datasets. More efficient approaches have been developed that are statistically consistent under the MSC model, including “gene tree summary methods”, which take a collection of gene trees as input and then compute a species tree from the gene trees using only the gene tree topologies. For example, NJst [23] runs Neighbor Joining (NJ) [43] on the “average gene tree internode distance” (AGID) matrix, and ASTRAL [27] finds a quartet-median tree (i.e. a species tree that maximizes the total quartet tree similarity to the input gene trees) within a constrained search space. However, gene tree summary methods can have reduced accuracy when gene tree estimation error is high, which is a problem for many phylogenomic datasets (see discussion in [31]).

Because of the impact of gene tree estimation error, alternative approaches that bypass gene tree estimation, called “site-based” methods, have been proposed. Perhaps the best known of site-based method is SVDquartets [9], which estimates quartet trees from the concatenated sequence alignments (using statistical properties of the MSC model and the sequence evolution model) and then combines the quartet trees into a tree on the full set of species using quartet amalgamation methods that are heuristics for the Maximum Quartet Consistency problem [18]. Other examples site-based methods include computing Jukes-Cantor [20] or log-det [46] distances from concatenated alignment and then running NJ on the resulting distance matrix. Such approaches can be statistically consistent under the MSC model when the sequence evolution models across genes satisfy some additional assumptions (e.g., a relaxed molecular clock) [10, 3].

Many of these methods (e.g., ASTRAL, SVDquartets, and concatenation using RAxML) are heuristics for NP-hard optimization problems. Such methods can have difficulties scaling to datasets with large numbers of species, and divide-and-conquer approaches have been developed to scale methods to larger datasets (e.g., the family of disk covering methods [55, 16, 21, 32, 6, 53]). Such methods operate by dividing the species set into overlapping subsets, constructing trees on the subsets, and then merging the subset trees into a tree on the entire species set. The last step of this process, called “supertree estimation”, can provide good accuracy (i.e., retain much of the accuracy in the subset trees) if good supertree methods are used. Notably, the supertree compatibility problem is NP-complete [7], and the preferred supertree methods attempt to solve NP-hard optimization problems (e.g., the Robinson-Foulds supertree problem [5], the Maximum Quartet Consistency problem [19], the Matrix Representation with Parsimony problem [38], and the Matrix Representation with Likelihood problem [34]). In summary, none of the current supertree methods provide

both accuracy and scalability to datasets with large numbers of species (see [54] for further discussion).

In this paper, we introduce a new divide-and-conquer approach to scaling phylogeny estimation methods to large datasets: we divide the species (or leaf) set into pairwise disjoint subsets, construct a tree on each of the subsets, and then assemble the subset trees into a tree on the entire species set. Supertree methods cannot be used to combine trees on pairwise disjoint leaf sets, and we present a new polynomial-time method, called NJMerge, for this task. We prove that NJMerge can be used in statistically consistent divide-and-conquer pipelines for both gene tree and species tree estimation and evaluate the effectiveness of using NJMerge in the context of multi-locus species tree estimation. We found, using an extensive simulation study, that NJMerge sometimes improved the accuracy of traditional NJ and that NJMerge provided substantial improvements in running time for three methods (ASTRAL-III [57], SVDquartets [9], and concatenation using RAxML [44]) without sacrificing accuracy. Furthermore, NJMerge enabled SVDquartets and RAxML to run on large datasets (e.g., 1000 taxa and 1000 genes), on which SVDquartets and RAxML would otherwise fail to run when limited to 64 GB of physical memory. While NJMerge is not guaranteed to return a tree; the failure rate in our experiments was low (less than 1% of tests). In addition, NJMerge failed on fewer datasets than either ASTRAL-III, SVDquartets, or RAxML — when given the same computational resources: a single compute node with 64GB of physical memory, 16 cores, and a maximum wall-clock time of 48 hours. Together, these results suggest that NJMerge is a valuable technique for large-scale phylogeny estimation, especially when computational resources are limited.

## NJMerge

Neighbor Joining (NJ) [43], perhaps the most widely used polynomial-time method for phylogeny estimation, estimates a tree  $T$  from a dissimilarity matrix  $D$ ; NJMerge is a polynomial-time extension of NJ to impose a set of constraints on the output tree  $T$  (Figure 1). More formally, NJMerge takes as input a dissimilarity matrix  $D$  on leaf set  $S = \{s_1, s_2, \dots, s_n\}$  and a set  $\mathcal{T} = \{T_1, T_2, \dots, T_k\}$  of unrooted binary trees on pairwise disjoint subsets of the leaf set  $S$  and returns a tree  $T$  that agrees with every tree in  $\mathcal{T}$  (Definition 1). Note that the output tree  $T$  is a compatibility supertree for  $\mathcal{T}$  and that because the trees in  $\mathcal{T}$  are on pairwise disjoint subsets of the leaf set  $S$ , a compatibility supertree always exists. NJMerge does not require that the input constraint trees  $\mathcal{T}$  form clades in  $T$ . For example, the caterpillar tree on  $\{A, B, C, D, E, F, G, H\}$  obtained by making a path with the leaves hanging off it in alphabetical order is a compatibility supertree for  $\mathcal{T} = \{AC|EG, BD|FH\}$ , and yet the trees in  $\mathcal{T}$  do not form clades within the caterpillar tree (Figure 2). Of course, other compatibility supertrees exist for  $\mathcal{T}$ , and, in some of them, the input constraint trees will form clades. The objective is to find a tree that is close to the true (but unknown) tree from the set of all compatibility supertrees for  $\mathcal{T}$ , and NJMerge tries to achieve this objective by using the dissimilarity matrix  $D$ .

**Definition 1.** *Let  $T$  be a tree on leaf set  $S$ , and let  $T'$  be a tree on leaf set  $R \subseteq S$ . We say that  $T'$  **agrees with**  $T$  if restricting  $T$  to leaf set  $R$  induces a binary tree that (after suppressing the internal nodes of degree 2) is isomorphic to  $T'$ .*

Here we briefly describe the NJ algorithm by Satiou and Nei [43]. NJ has an iterative design that builds the tree from the bottom up, producing a rooted tree that is then unrooted. Initially, all  $n$  leaves are in separate components. When a pair of leaves is selected

to be siblings, the pair of leaves is effectively replaced by a rooted tree on two leaves, and the number of components is reduced by one. This process repeats until there is only one component: a tree on the full leaf set. At each iteration, NJ updates  $D$  based on the new sibling pair, derives a new matrix  $Q$  from  $D$ , and uses  $Q$  to determine which pair of the remaining nodes to join. Specifically, NJ accepts siblinghood proposal  $(i, j)$  such that  $Q[i, j]$  is minimized. The same formulas used by NJ [43] to update  $D$  and compute  $Q$  are also used by NJMerge; however, NJMerge can make different siblinghood decisions than NJ — based on the input constraint trees.

After each siblinghood decision, NJMerge updates the constraint trees. Specifically, when two leaves are made siblings, they are replaced by a new leaf, and the constraint trees are relabeled. For example, if  $x$  is a leaf in  $T_i$  and  $y$  is a leaf in  $T_j$ , then the siblinghood proposal  $z = (x, y)$  requires that  $x$  and  $y$  are replaced with  $z$  in  $T_i$  and  $T_j$ , respectively. Because siblinghood decisions change the set of leaves in the constraint trees, they can result in the constraint trees no longer being disjoint (Figure 3). Thus, siblinghood decisions have the potential to make the set of constraint trees incompatible. Determining whether or not a set of unrooted phylogenetic trees is compatible is an NP-complete problem [45, 52], so NJMerge uses a polynomial-time heuristic. In each iteration, NJMerge sorts the entries of the  $Q$  from least to greatest and accepts the first siblinghood proposal  $(x, y)$  that satisfies the following properties:

1. If  $x$  and  $y$  are both in some constraint tree  $T_i$ , then they are siblings in  $T_i$ .
2. If  $x$  or  $y$  are in more than one constraint trees, then replacing  $x$  and  $y$  with a new leaf  $z = (x, y)$  in all constraint trees does not make any *pair* of constraint trees incompatible, i.e., a compatibility supertree exists for every *pair* of updated constraint trees.

Because pairwise compatibility of unrooted trees does not guarantee that the entire set of constraint trees is compatible, it is possible for NJMerge to accept a siblinghood decision that will eventually cause the algorithm to fail when none of the remaining leaves can be joined without violating the pairwise compatibility of constraint trees. Although the “pairwise compatibility heuristic” can fail, it is easy to see that if NJMerge returns a tree, then it is a compatibility supertree for the input set  $\mathcal{T}$  of constraint trees.

To determine if some pair of constraint trees becomes incompatible after making  $x$  and  $y$  siblings, it suffices to check only those pairs of constraint trees that contain at least one of  $x$  and  $y$ ; all other pairs of trees are unchanged by accepting the siblinghood proposal and are pairwise compatible by induction. Because the leaves in the two trees labeled  $x$  or  $y$  have been relabeled by the new leaf  $z = (x, y)$ , they can be treated as rooted trees by rooting them at  $z$ . Testing the compatibility of rooted trees is easily accomplished in polynomial time using [1]. In fact, instead of testing pairs of constraint trees, the entire set of trees in  $\mathcal{T}$  containing the new leaf  $z = (x, y)$  can be tested for compatibility in polynomial time using [1]. Furthermore, if at least one leaf exists in all constraint trees, then the compatibility of  $\mathcal{T}$  can be determined in polynomial time. Finally, note the input matrix was referred to as a dissimilarity matrix (and not a distance matrix), because estimated distances between species may not satisfy the triangle inequality [53]; however, this matrix is more commonly referred to as a distance matrix, and we use this term henceforth.

## Divide-and-Conquer Pipelines for Phylogeny Estimation

NJMerge can be used in divide-and-conquer pipelines for phylogeny estimation as described below and shown in Figure 4.

1. Estimate distances between pairs of leaves using method  $M_D$ .
2. Decompose the leaf set into pairwise disjoint subsets.
  - 2a. Compute a starting tree by running NJ on the distance matrix computed in Step 1.
  - 2b. Decompose the starting tree into pairwise disjoint subsets of leaves with a predefined maximum subset size (e.g., using the centroid tree decomposition described in PASTA [26]).
3. Build a tree on each subset using method  $M_T$ , thus producing the set  $\mathcal{T}$  of constraint trees. Note that constraint trees can be estimated in serial or in parallel, depending on the computational resources available.
4. Run NJMerge on the input pair  $(\mathcal{T}, D)$ .

In order to use NJMerge in a divide-and-conquer pipeline, the user must define the method for computing a distance matrix  $M_D$  (Step 1), the method for decomposing the leaf set into pairwise disjoint subsets and the maximum subset size (Step 2), and the method  $M_T$  for computing subset trees (Step 3). Thus, the user can define  $M_D$  and  $M_T$  to be appropriate for gene tree estimation or species tree estimation. Finally, although not explored in this study, this pipeline can be run in an iterative fashion by using the tree produced in Step 4 to define the next subset decomposition.

## Statistical Consistency

Neighbor Joining (NJ) has been proven to be statistically consistent [14, 4, 8] under models of evolution for which pairwise distances can be estimated in a statistically consistent manner. This includes standard models of sequence evolution (e.g., the Generalized Time Reversible (GTR) model [50], which contains other models of sequence evolution, including Jukes-Cantor [20]). More recently, NJ has been used on multi-locus datasets to estimate species trees under the Multi-Species Coalescent (MSC) model; specifically, the method, NJst [23] estimates a species tree by running NJ on the average gene tree internode distance (AGID) matrix, calculated by averaging the topological distances between pairs of species in the input set of gene trees. Allman et al. [2] showed that the AGID matrix converges to an additive matrix for the species tree, and so NJst and some other methods (e.g., ASTRID [51]) that estimate species trees from the AGID matrix are statistically consistent under the MSC model.

We now prove that NJMerge can be used in statistically consistent divide-and-conquer pipelines for estimating gene trees and species trees. These results follow from Theorem 3 that shows NJMerge will return the tree  $T^*$  when given a nearly additive distance matrix (Definition 2) for  $T^*$  and a set  $\mathcal{T}$  of constraint trees that agree with  $T^*$  (Definition 1).

**Definition 2.** *Let  $T$  be a tree with positive weights on the edges and leaves labelled  $1, 2, \dots, n$ . We say that an  $n \times n$  matrix  $M$  is **nearly additive** for  $T$  if each entry  $M[i, j]$  differs from the distance between leaf  $i$  and leaf  $j$  in  $T$  by less than one half of the shortest branch length in  $T$ .*

**Theorem 3.** Let  $\mathcal{T} = \{T_1, T_2, \dots, T_k\}$  be a set of constraint trees on pairwise disjoint leaf sets, and let  $D$  be a distance matrix on  $S = \bigcup_i S_i$ , where  $S_i$  is the set of leaves in  $T_i$ . Let  $T^*$  be the true tree on leaf set  $S$ . If  $D$  is a nearly additive matrix for  $T^*$  and if constraint tree  $T_i$  agrees with  $T^*$  for all  $i \in \{1, \dots, k\}$ , then NJMerge applied to input  $(\mathcal{T}, D)$  returns  $T^*$ .

*Proof.* NJ applied to a nearly additive distance matrix for  $T^*$  will return  $T^*$  [4]. Because all constraint trees in  $\mathcal{T}$  agree with  $T^*$ , the siblinghood proposals suggested by NJ will never violate the constraint trees  $\mathcal{T}$  or the compatibility of  $\mathcal{T}$ . Thus, NJMerge applied to  $(\mathcal{T}, D)$  will return the same output as NJ applied to  $D$ , which is  $T^*$ .  $\square$

We now define statistical consistency in the context of gene tree estimation (Definition 4) and show that NJMerge can be used to create statistically consistent divide-and-conquer pipelines for gene tree estimation (Corollary 5).

**Definition 4.** Let  $(T, \Theta)$  be a GTR model tree with topology  $T$  and numerical parameters  $\Theta$  (e.g., substitution rate matrix, branch lengths, etc). A method  $M$  for constructing gene trees from DNA sequences is **statistically consistent** under the GTR model if, for all  $\epsilon > 0$ , there exists a constant  $l > 0$  such that, given sequences of length at least  $l$ ,  $M$  returns  $T$  with probability at least  $1 - \epsilon$ .

**Corollary 5.** NJMerge can be used in a gene tree estimation pipeline that is statistically consistent under the GTR model of sequence evolution.

*Proof.* Let  $(T^*, \Theta)$  be a GTR model tree, let  $M_D$  be a method for calculating distances between pairs of sequences, and let  $M_T$  be a method for constructing trees from DNA sequences. Suppose that

- the divide-and-conquer pipeline produces  $k$  pairwise disjoint subsets of sequences
- Neighbor Joining (NJ) applied to a matrix of pairwise distances calculated using  $M_D$  is a statistically consistent method for constructing gene trees under the GTR model (e.g., the log-det distance [46])
- $M_T$  is statistically consistent under the GTR model (e.g., maximum likelihood [33, 12])

Now let  $\epsilon > 0$ , and select  $\epsilon_D, \epsilon_T > 0$  such that  $\epsilon_D + k\epsilon_T < \epsilon$ . By Definition 4, there exists a constant  $l_D$  such that NJ applied to matrix  $D$  computed from sequences of length at least  $l_D$  returns  $T^*$  with probability at least  $1 - \epsilon_D$ , and there exists a constant  $l_T$  such that  $M_T$  given DNA sequences length at least  $l_T$  returns  $T^*$  with probability at least  $1 - \epsilon_T$ . If a distance matrix  $D$  is calculated using  $M_D$  and a set of  $k$  constraint trees  $\mathcal{T}$  are constructed using  $M_T$ , given sequences of length at least  $\max\{l_D, l_T\}$ , then the probability that NJ applied to  $D$  returns  $T^*$  and that  $M_T$  returns a tree that agrees with  $T^*$  for all  $k$  constraint trees in  $\mathcal{T}$  is at least  $1 - \epsilon$ , as

$$\begin{aligned} (1 - \epsilon_D)(1 - \epsilon_T)^k &\geq (1 - \epsilon_D)(1 - k\epsilon_T) \quad \text{by Bernoulli's Inequality [29]} \\ &= 1 - \epsilon_D - k\epsilon_T + k\epsilon_D\epsilon_T \\ &> 1 - (\epsilon_D + k\epsilon_T) > 1 - \epsilon \end{aligned}$$

Then, by Theorem 3, NJMerge applied to the input  $(\mathcal{T}, D)$  will return the  $T^*$  with probability at least  $1 - \epsilon$ , and by Definition 4, NJMerge is statistically consistent under the GTR model.  $\square$



Finally, we define statistical consistency in the context of species tree estimation (Definition 7) and show that NJMerge can be used to create statistically consistent divide-and-conquer pipelines for species estimation (Corollary 7).

**Definition 6.** Let  $(T, \Theta)$  be a MSC model tree with topology  $T$  and numerical parameters  $\Theta$  (e.g., substitution rate matrix, branch lengths, etc). A method  $M$  for constructing species trees from true gene trees is **statistically consistent** under the MSC model if, for all  $\epsilon > 0$ , there exists a constant  $m > 0$  such that, given at least  $m$  true gene trees,  $M$  returns  $T$  with probability at least  $1 - \epsilon$ .

**Corollary 7.** NJMerge can be used in a species tree estimation pipeline that is statistically consistent under the MSC model.

*Proof.* Let  $(T^*, \Theta)$  be an MSC model tree, let  $M_D$  be a method for calculating distances between pairs of species from a set of gene trees, and let  $M_T$  be a method for constructing species trees from a set of gene trees. Suppose that

- the divide-and-conquer pipeline produces  $k$  pairwise disjoint subsets of sequences
- Neighbor Joining (NJ) applied to a matrix of pairwise distances calculated using  $M_D$  is a statistically consistent method for constructing species trees under the MSC model (e.g., the average topological distance between species in the input set of gene trees [2] )
- $M_T$  is statistically consistent under the MSC model (e.g., ASTRAL [27, 28])

Now let  $\epsilon > 0$ , and select  $\epsilon_D, \epsilon_T > 0$  such that  $\epsilon_D + k\epsilon_T < \epsilon$ . By Definition 6, there exists a constant  $m_D$  such that NJ applied to matrix  $D$  computed from at least  $m_D$  gene trees returns  $T^*$  with probability at least  $1 - \epsilon_D$ , and there exists a constant  $m_T$  such that  $M_T$  given at least  $m_T$  gene trees returns  $T^*$  with probability at least  $1 - \epsilon_T$ . If a distance matrix  $D$  is calculated using  $M_D$  and a set of constraint trees  $\mathcal{T}$  are constructed using  $M_T$ , both given at least  $\max\{m_D, m_T\}$  gene trees, then the probability that NJ applied to  $D$  returns  $T^*$  and that  $M_T$  returns a tree that agree with  $T^*$  for all  $k$  constraint trees in  $\mathcal{T}$  is at least  $1 - \epsilon$ . Then, by Theorem 3, NJMerge applied to the input  $(\mathcal{T}, D)$  will return the  $T^*$  with probability at least  $1 - \epsilon$ , and by Definition 6, NJMerge is statistically consistent under the MSC model.  $\square$

## Performance Study

Our study evaluated the effectiveness of using NJMerge to estimate species trees on large multi-locus datasets, simulated for this study using the protocol presented in [28]. Our simulation produced model conditions, described by two numbers of taxa (100 and 1000) and two levels of ILS (low/moderate and very high), each with 20 replicate datasets. Datasets included both exon-like sequences and intron-like sequences with exon-like sequences (“exons”) characterized by slower rates of evolution across sites (less phylogenetic signal) and intron-like sequences (“introns”) characterized by faster rates of evolution across sites (greater phylogenetic signal). The 100-taxon datasets were analyzed using 25, 100, and 1000 genes, and the 1000-taxon datasets were analyzed using 1000 genes; note that exons and introns were always analyzed separately. For each of these 320 datasets, we constructed distance matrices using two different methods and constraint trees using four different methods. This

provided 2560 different tests on which to evaluate NJMerge. NJMerge failed on 11/2560 tests, so the failure rate (in our experiments) was less than 1%. All species tree methods were evaluated in terms of species tree estimation error (computed using normalized Robinson-Foulds (RF) distances [40]) and running time. All software commands are provided in Additional file 1.

## Simulated Datasets

**True species and true gene trees.** Datasets, each with a true species tree and 2000 true gene trees, were simulated using SimPhy version 1.0.2 [25]. All model conditions had deep speciation (towards the root) and 20 replicate datasets. By holding the effective population size constant (200K) and varying the species tree height (in generations), model conditions with different levels of ILS were generated. For species tree heights of 10M and 500K generations, the average distance between the true species tree and the true gene trees (as measured by the normalized RF distance) was 8-10% and 68-69% respectively. Thus, we referred to these levels of ILS as “low/moderate” and “very high” respectively.

**True sequence alignments.** Sequence alignments were simulated for each true gene tree using INDELible version 1.03 [13] under the GTR+ $\Gamma$  model of evolution without insertions or deletions. For each gene, the parameters for the GTR+ $\Gamma$  model of evolution (base frequencies, substitution rates, and alpha) were drawn from distributions based on estimates of these parameters from the Avian Phylogenomics Dataset [17]; distributions were fitted for exons and introns, separately (Supplementary Table S1, Additional file 1). For each dataset (with 2000 genes), 1000 gene sequences were simulated with parameters drawn from the exon distributions, and 1000 gene sequences were simulated with parameters drawn from the intron distributions. Note that exons and introns were analyzed separately. The sequence lengths were also drawn from a distribution (varying from 300 to 1500 bp).

**Estimated gene trees.** Maximum likelihood gene trees were estimated using FastTree-2 [37] under the GTR+CAT model of evolution. The average gene tree estimation error (computed using normalized RF distances between true and estimated gene trees) across all replicates ranged from 26% to 51% for introns and 38% to 64% for exons; thus gene tree estimation error was higher for the exon datasets (Supplementary Table S2, Additional file 1).

## Estimated Species Trees

For each model condition (described by number of taxa and level of ILS), species trees estimation methods were run on the exon-like genes and the intron-like genes, separately. Species trees were estimated on 25, 100, or 1000 genes for the 100-taxon datasets and 1000 genes for the 1000-taxon datasets using three species tree estimation methods: ASTRAL-III [27, 28, 57] version 5.6.1, SVDquartets [9] (as implemented in PAUP\* version 4a161 [49]), and concatenation using unpartitioned maximum likelihood under the GTR+ $\Gamma$  model of evolution (as implemented in RAxML [44] version 8.2.12 with pthreads and SSE3).

## NJMerge.

**Distance matrices.** Distance matrices were created using two different approaches.



- $D_{AGID}$  refers to the average gene tree internode distance (AGID) matrix [23], computed from estimated gene trees using ASTRID [51] version 1.1.
- $D_{LD}$  refers to the log-det distance matrix [46], computed from concatenated alignment using PAUP\* [49] version 4a163.

Recall that NJ applied to the AGID matrix (i.e., NJst [23]) was proven to be statistically consistent method under the MSC model [2] and that NJ applied to the log-det distance matrix was proven to be statistically consistent under the MSC model when the sequence evolution models across genes satisfy some additional assumptions (e.g., a relaxed molecular clock) [3].

**Subset decomposition.** We decomposed the species set into subsets as indicated by the blue dashed arrows in Figure 4. Specifically, the NJ tree was computed for each distance matrix using FastME [22] version 2.1.5 and then the centroid tree decomposition (described in PASTA [26]) was used to create disjoint subsets of taxa from the NJ tree. Datasets with 100 species were decomposed into 4-6 subsets with a maximum subset size of 30 taxa, and datasets with 1000 species were decomposed into 10-15 subsets with a maximum subset size of 120 taxa.

**Constraint trees.** Constraint trees were created using four different approaches.

- $\mathcal{T}_{true}$  refers to constraint trees computed by restricting the true species tree to each subset of species.
- $\mathcal{T}_{AST}$  refers to constraint trees computed by running ASTRAL-III on each subset, i.e., on the estimated gene trees restricted to each subset of species.
- $\mathcal{T}_{SVD}$  refers to constraint trees computed by running SVDquartets on each subset, i.e., on the concatenated alignment restricted to each subset of species.
- $\mathcal{T}_{RAX}$  refers to constraint trees computed by running RAxML on each subset, i.e., on the concatenated alignment restricted to each subset of species.

**Notation.** We often specify the inputs to NJ and NJMerge using the following notation:  $NJ(D)$  and  $NJMerge(\mathcal{T}, D)$ . For example,  $NJMerge(\mathcal{T}_{RAX}, D_{LD})$  refers to NJMerge given the RAxML constraint trees and the log-det distance matrix as input, whereas  $NJMerge(\mathcal{T}_{RAX}, D)$  refers to NJMerge given the RAxML constraint trees and the AGID or the log-det distance matrix as input.

## Evaluation

**Species tree estimation error.** Species tree estimation error was measured as the RF error rate, i.e., the normalized RF distance between the true and the estimated species trees both on the full species set. Since both trees were fully resolved or binary, the RF error rate is the proportion of edges in the true tree that are missing in the estimated tree. RF error rates were computed using Dendropy [47].

**Running time.** All computational experiments were run on the Blue Waters supercomputer, specifically, the XE6 dual-socket nodes with 64 GB of physical memory and two AMD Interlagos model 6276 CPU processors (i.e., one per socket each with 8 floating point cores). All methods were given access to 16 threads with 1 thread per bulldozer (floating-point) core. SVDquartets and RAxML were explicitly run with 16 threads; however, ASTRAL-III and NJMerge currently were not implemented with multi-threading at the time of this study. All methods were restricted to a maximum wall-clock time of 48 hours.

Running time was measured as the wall-clock time and recorded in seconds for all methods (Tables S7 and S8, Additional file 1). For ASTRAL, SVDquartets, and RAxML, the timing data was recorded for running the method on the full dataset as well as running the method on subsets of the dataset (to produce constraint trees for NJMerge). RAxML did not complete within the maximum wall-clock time of 48 hours on datasets with 1000 taxa, so we used the last checkpoint file to evaluate species tree estimation error and running time. Specifically, running time was measured as the time between the info file being written and the last checkpoint file being written.

We approximated total running time of the NJMerge pipeline by combining the running timing data for estimating subset trees as well as the running timing data for combining the subset trees using NJMerge. If a study only had access to one compute node, then subset trees would need to be estimated in serial. In this case, the running time of NJMerge would be approximated as

$$T_s = \sum_{i=1}^N T_i^M + T_{NJM} \quad (1)$$

where  $N$  is the number of subsets,  $T_i^M$  is the running time of using the base method (i.e., ASTRAL-III, SVDquartets or RAxML) to compute a species tree on subset  $i$ , and  $T_{NJM}$  is the running time of using NJMerge to combine the subset trees into a single tree on the full taxon set. Note that the average running times for  $T^M$  and  $T_{NJM}$  are shown in Supplementary tables S7 and S8, Additional file 1.

If a study had access to multiple compute nodes (specifically at least 6 for the 100-taxon datasets and at least 15 for the 1000-species datasets), then the subset trees could be estimated in parallel. In this case, the running time of NJMerge would be approximated as

$$T_p = \max_{1 \leq i \leq N} T_i^M + T_{NJM} \quad (2)$$

where  $N$  is the number of subsets,  $T_i^M$  is the running time of using the base method (i.e., ASTRAL-III, SVDquartets or RAxML) to compute a tree on subset  $i$ , and  $T_{NJM}$  is the running time of using NJMerge to combine the subset trees into a single tree on the full taxon set. In this paper, only the running times computed using Equation 1 are shown; however, running times computed using Equation 2 can be found in [30].

The approximate running times given above for the NJMerge pipeline assume that the distance matrix has already been computed, which is typically inexpensive for datasets with up to 1000 species. However, we note that the AGID matrix required the computation of gene trees and give an approximation of the additional running time required to estimate gene trees using FastTree-2 (see Additional file 1). For datasets with 100 species, FastTree-2 took approximately 5.3 minutes to estimate 1000 gene trees, and for datasets with 1000 species, FastTree-2 took approximately 65 minutes to estimate 1000 gene trees.

## Results

Pipelines using NJMerge can be thought of in two ways: 1) as techniques for potentially improving the accuracy of NJ (hopefully without a large increase in running time) or 2) as techniques for potentially improving the scalability or speed of the base method used to compute constraint trees (hopefully without sacrificing accuracy). When distance-based species tree estimation is not as accurate as some other species tree methods, we would predict that NJMerge (when given constraint trees estimated using highly accurate species tree methods) would be more accurate than traditional NJ. Because NJMerge, like NJ, is typically faster than other species tree methods, we would predict that NJMerge would improve the running time of more computationally intensive methods (such as RAxML) used to estimate constraint trees, hopefully without sacrificing accuracy. Thus, we compared the accuracy of NJMerge to NJ, and we compared the accuracy and running time of NJMerge (with constraint trees estimated using different base methods: ASTRAL-III, SVDquartets, and RAxML) to the running the same base method on the full dataset.

Results are shown here for intron-like datasets; results for exon-like datasets are shown in Additional file 1. Unless otherwise noted, results were similar for both sequence types; however, species trees estimated on the exon datasets had slightly higher error rates than those estimated on the intron datasets. This is expected, as the exons had slower rates of evolution (and thus less phylogenetic signal) than the introns.

### How do pipelines using NJMerge compare to Neighbor Joining (NJ)?

In this section, we report results on the effectiveness of using NJMerge as compared to NJ in terms of accuracy.

**Impact of estimated distance matrix.** We compared the accuracy of the NJMerge pipeline to traditional NJ on distance matrices estimated from datasets with 100 taxa and varying numbers of genes (Figure 5; Supplementary Figure S1, Additional file 1). Because the accuracy of NJMerge also depends on error in the input constraint trees, we considered an idealized case where NJMerge was given true constraint trees (i.e., constraint trees that agree with the true species tree). We found that  $\text{NJMerge}(\mathcal{T}_{true}, D)$  was more accurate than  $\text{NJ}(D)$  for all model conditions and that the difference in error was especially large when the number of genes was small and the level of ILS was very high (e.g., the difference in mean error was greater than 15% when matrices were estimated from 25 introns but was closer to 5% when matrices were estimated from 1000 introns). A similar trend was observed for matrices computed using the log-det distance. Interestingly, both  $\text{NJ}(D)$  and  $\text{NJMerge}(\mathcal{T}_{true}, D)$  were more accurate when given the AGID matrix rather than the log-det distance matrix as input — even when the level of ILS was low/moderate (Figure 5 and Supplementary Figure S1, Additional file 1). In summary,  $\text{NJMerge}(\mathcal{T}_{true}, D)$  was always more accurate than  $\text{NJ}(D)$ , but the improvement in accuracy was greater under challenging model conditions, suggesting that  $\text{NJMerge}(\mathcal{T}_{true}, D)$  was more robust to error in the distance matrix than  $\text{NJ}(D)$ .

**Impact of estimated constraint trees.** We compared traditional NJ to the NJMerge pipeline given estimated constraint trees on datasets with 1000 taxa and 1000 genes (Figure 6; Supplementary Figure S2, Additional file 1). When the level of ILS was low/moderate, NJMerge outperformed NJ regardless of the method used to estimate species trees. For

intron-like datasets with low/moderate ILS, the use of constraint trees reduced the median species tree error from 11–14% (NJ) to less than 3–6% (NJMerge); however, when the level of ILS was very high, the performance of NJMerge varied greatly with the species tree method. Specifically,  $\text{NJMerge}(\mathcal{T}_{SVD}, D)$  and  $\text{NJMerge}(\mathcal{T}_{RAX}, D)$  were less accurate than  $\text{NJ}(D)$  by 0–4% on average, whereas  $\text{NJMerge}(\mathcal{T}_{AST}, D)$  was more accurate than  $\text{NJ}(D)$  by 0–1% on average (Supplementary Tables S5 and S6, Additional file 1). These trends were consistent with the relative performance of methods on the 100-taxon datasets (Figure 7 and Supplementary Figure S3, Additional file 1); specifically, when the level of ILS was very high, SVDquartets and RAxML performed worse than running NJ on *either* the AGID matrix or the log-det distance matrix. In summary, NJMerge was highly impacted by the quality of the constraint trees — so that accurate constraint trees resulted in NJMerge being more accurate than NJ, but inaccurate constraint trees resulted in NJMerge being less accurate than NJ.

## How do pipelines using NJMerge compare to ASTRAL-III, SVDquartets, and RAxML?

In this section, we report the running time and accuracy of the NJMerge pipeline using three different base methods (ASTRAL-III, SVDquartets, RAxML) to estimate constraint trees in comparison to running the base method on the full dataset. Because NJMerge was more accurate when given the AGID matrix (Figure 5; Supplementary Figure S1, Additional file 1), results for NJMerge given the AGID distance matrix are shown here, and results for NJMerge given the log-det distance matrix are shown in Additional file 1.

**ASTRAL-III vs. NJMerge.** Both  $\text{NJMerge}(\mathcal{T}_{AST}, D_{AGID})$  and  $\text{NJMerge}(\mathcal{T}_{AST}, D_{LD})$  provided running time advantages over ASTRAL-III under some model conditions. While ASTRAL-III completed on all the low/moderate ILS datasets with 1000 taxa and 1000 genes in less than 9 hours on average, ASTRAL-III failed to complete within the maximum wall-clock time of 48 hours on 23/40 datasets with 1000 taxa, 1000 genes, and very high ILS (Table 1). On the other 17/40 datasets, ASTRAL-III ran for more than 2000 minutes (approximately 33 hours). This difference between the low/moderate ILS and the very high ILS datasets is noteworthy (see discussion). In contrast, both  $\text{NJMerge}(\mathcal{T}_{AST}, D_{AGID})$  and  $\text{NJMerge}(\mathcal{T}_{AST}, D_{LD})$  completed in under 300 minutes (approximately 5 hours) on average, including the time it took to estimate subset trees with ASTRAL-III in serial (Figure 8, Supplementary Figure S4, Additional file 1).  $\text{NJMerge}(\mathcal{T}_{AST}, D_{AGID})$  failed on zero datasets, and  $\text{NJMerge}(\mathcal{T}_{AST}, D_{LD})$  failed on two datasets (Table 1). In summary, NJMerge substantially reduced the running time of ASTRAL-III on the 1000-taxon, 1000-gene datasets with very high ILS.

ASTRAL-III and  $\text{NJMerge}(\mathcal{T}_{AST}, D_{AGID})$  achieved similar levels of accuracy with the mean species tree error within 0–2% for both intron and exon datasets (Figure 8; Supplementary Figure S4, Additional file 1; Supplementary Table S5, Additional file 1). Trends were similar for  $\text{NJMerge}(\mathcal{T}_{AST}, D_{LD})$  except when the level of ILS was very high; under these conditions, the mean error of  $\text{NJMerge}(\mathcal{T}_{AST}, D_{LD})$  was 2–6% greater than that of ASTRAL-III (Supplementary Figures S7 and S8, Additional file 1; Supplementary Table S6, Additional file 1).

**NJMerge vs. SVDquartets.** Species trees can be estimated with SVDquartets using the full set of  $\binom{n}{4}$  quartet trees or a subset of quartet trees. Based on a prior study

[48], which showed that the best accuracy was obtained when using all quartet trees, we computed all  $\binom{n}{4}$  quartet trees for 100-taxon datasets. However, on datasets with 1000 taxa, SVDquartets was run using a random subset of quartet trees (without replacement), because the maximum number of quartets allowed by SVDquartets (as implemented by PAUP\*) was  $4.15833 \times 10^{10}$ . Running PAUP\* resulted in a segmentation fault for all 1000-taxon datasets, i.e., SVDquartets failed on 40/40 datasets with 1000 taxa and 1000 genes. In contrast, NJMerge( $\mathcal{T}_{SVD}$ ,  $D_{AGID}$ ) failed on 0 datasets, and NJMerge( $\mathcal{T}_{SVD}$ ,  $D_{LD}$ ) failed on 3 datasets (Table 1).

NJMerge also improved running time on datasets with 100 taxa; for example, SVDquartets completed in 19–81 minutes on average, whereas NJMerge( $\mathcal{T}_{SVD}$ ,  $D_{AGID}$ ) completed in less than 2 minutes on average for datasets with 100 taxa and 1000 genes (Figure 9; Supplementary Figure S5, Additional file 1). This running time comparison does not take into account the time needed to estimate gene trees, which required approximately 5.3 minutes using FastTree-2 on datasets with 100 taxa and 1000 genes.

NJMerge( $\mathcal{T}_{SVD}$ ,  $D_{AGID}$ ) typically produced species trees with less error than SVDquartets. The difference between methods was typically small (between 0–2%) when the level of ILS was low/moderate but could be larger than 10% when the level of ILS was very high. Similar trends were observed for NJMerge( $\mathcal{T}_{SVD}$ ,  $D_{LD}$ ) (Supplementary figures S9 and S10, Additional file 1).

**NJMerge vs. RAxML.** NJMerge( $\mathcal{T}_{RAX}$ ,  $D_{AGID}$ ) and NJMerge( $\mathcal{T}_{RAX}$ ,  $D_{LD}$ ) reduced the running time of RAxML by more than half — even when RAxML was run on the subset trees in serial (Figure 10 and Supplementary Figure S6, Additional file 1). For the 1000-taxon datasets, the final checkpoint was written by RAxML after more than 2250 minutes ( $\sim 37.5$  hours) on average. In comparison, when RAxML was run on subsets in serial, the average running time of NJMerge( $\mathcal{T}_{RAX}$ ,  $D_{AGID}$ ) was between 500 (approximately 8.5 hours) and 1500 minutes (approximately 25 hours). Although these running times for NJMerge do not include the time to estimate gene trees, recall that it took approximately 65 minutes to estimate 1000 gene trees on datasets with 1000 species using FastTree-2.

While NJMerge can fail to return a tree, NJMerge failed less frequently than RAxML — when both methods were given the same computational resources. NJMerge( $\mathcal{T}_{RAX}$ ,  $D_{AGID}$ ) failed on one dataset, and NJMerge( $\mathcal{T}_{RAX}$ ,  $D_{LD}$ ) failed on two datasets. In contrast, for datasets with 1000 taxa, RAxML failed to run on 38 intron-like datasets and 3 exon-like datasets due to “Out of Memory” (OOM) errors (Table 1); the difference between the number of intron-like versus the number of exon-like datasets is noteworthy (see discussion).

For datasets with low/moderate levels of ILS, RAxML produced species trees with less error (0–3% on average) than NJMerge( $\mathcal{T}_{RAX}$ ,  $D_{AGID}$ ); however, for datasets with very high levels of ILS, NJMerge( $\mathcal{T}_{RAX}$ ,  $D_{AGID}$ ) produced species trees with less error 0–4% on average) than RAxML (Figure 10 and Supplementary Figure S3 and Table S5, Additional file 1). Similar trends were observed for NJMerge( $\mathcal{T}_{RAX}$ ,  $D_{LD}$ ) (Supplementary figures S11 and S12, Additional file 1).

## Discussion

### Remarks on the utility of pipeline’s using NJMerge

Pipelines using NJMerge can be viewed either as techniques for improving traditional NJ or as techniques for scaling a computationally-intensive base method to larger datasets. Thus,

in order to maximize the utility of NJMerge, users should select a base method that is both more accurate and more computationally-intensive than NJ. Our results show that selecting base methods for NJMerge may not be trivial when analyzing phylogenomic datasets — because both accuracy and running time were impacted by the level of ILS. For example, ASTRAL-III was very fast when the level of ILS was low/moderate but was substantially slower when the level of ILS was very high. Similarly, SVDquartets and RAxML were both more accurate than NJ( $D_{AGID}$ ), i.e., NJst, when the level of ILS was low/moderate but were less accurate than these methods when the level of ILS was very high; note that this trend is consistent with results from [31] (also see the review paper by [56]). Overall, our results suggest that constraint trees should be estimated using RAxML when the level of ILS is low/moderate and using ASTRAL-III when the level of ILS is very high, and thus, determining whether the level of ILS in a given phylogenomic datasets is an important area of future research. Finally, we note that NJMerge, when given constraint trees that agreed with the true species tree, was very accurate (less than 2% error on average) even when the level was very high, suggesting that NJMerge is a promising technique for scaling Bayesian methods (e.g., Starbeast2 [35]) and future species tree methods to larger datasets.

Although NJMerge can fail, this should not discourage potential users, as NJMerge failed on fewer datasets than ASTRAL-III, SVDquartets, or RAxML — when all methods were given the same computational resources, including a maximum wall-clock time of 48 hours. In our experiments, NJMerge failed on only 11/2560 test cases from running NJMerge on 320 datasets with two different types of distance matrices and four different types of constraint trees (Table 1).

Importantly, in all our experiments, NJMerge was run within the divide-and-conquer pipeline shown in Figure 4, specifically, with subsets of taxa derived from decomposing the NJ tree (blue dashed lines). Because NJMerge was always given inputs generated by this pipeline, our results on the accuracy, the failure rate, and the running time of NJMerge may not generalize to arbitrary inputs.

## Remarks on other results

**Impact of distance matrix on NJ.** Our results showed that on average NJ( $D_{AGID}$ ) was either as accurate or else more accurate than NJ( $D_{LD}$ ). Notably, there was a clear difference between these two methods on datasets with 100 taxa and low/moderate levels of ILS; specifically NJ( $D_{AGID}$ ) produced trees with less than 5% error on average, whereas NJ( $D_{LD}$ ) produced trees with greater than 10% error on average). However, on the exact same model condition but with 1000 taxa, NJ( $D_{AGID}$ ) and NJ( $D_{LD}$ ) produced trees with similar levels of accuracy. This may be due to the difference between the median branch length between low/moderate ILS datasets with 100 taxa and 1000 taxa (Supplementary Table S3, Additional file 1); furthermore, it is possible that ranch length and other factors that limit the accuracy of NJ( $D_{LD}$ ) in the context of gene tree estimation would also apply in the context of species tree estimation. However, it is interesting to note that NJ( $D_{LD}$ ) was more accurate than either SVDquartets or RAxML when the level of ILS was very high, providing support for Allman et al.’s statement, “The simplicity and speed of distance-based inference suggests log-det based methods should serve as benchmarks for judging more elaborate and computationally-intensive species trees inference methods” [3].

**Impact of ILS and sequence type on ASTRAL-III.** Our results showed that ASTRAL-III was much faster on the low/moderate ILS datasets than on the very high ILS



datasets. This finding makes sense in light of ASTRAL-III's algorithm design. ASTRAL-III operates by searching for an optimal solution to its search problem within a constrained search space that is defined by the set  $\mathcal{X}$  of bipartitions in the estimated gene trees, and in particular, ASTRAL-III's running time scales with  $|\mathcal{X}|^{1.726}$  [57]. The set of gene trees will become more heterogeneous for higher levels of ILS, and thus, the size of  $\mathcal{X}$  will increase, as every gene tree could be different when the level of ILS is very high. In addition, gene tree estimation error can also increase the size of  $\mathcal{X}$ , explaining why ASTRAL-III failed to complete on the exon datasets more often than on the intron datasets (Supplementary Table S2, Additional file 1).

**Impact of sequence type on RAxML.** Our results showed that RAxML failed on more intron-like datasets than exon-like datasets. This finding makes sense in light of RAxML's implementation. RAxML uses redundancy in site patterns to store the input alignment compactly, so that the memory scales with the number of unique site patterns. The intron datasets had more unique site patterns than the exon datasets (i.e., greater phylogenetic signal and lower gene tree estimation error), which explains why RAxML required more memory when analyzing introns.

## Remarks on the statistical consistency of pipelines using NJMerge

Although NJMerge can fail, statistical consistency under the MSC (Corollary 7) model means that NJMerge will not fail when the number of true gene trees goes to infinity. In fact, NJMerge was designed to have this theoretical guarantee via the selection of the heuristic for determining whether or not to accept a siblinghood proposal. It is easy to think of other heuristics that prevent NJMerge from failing but do *not* have the guarantee of correctness (Theorem 3) and thus do *not* have the guarantee of statistical consistency (Corollary 7). Designing heuristics that prevent NJMerge from failing but have good theoretical properties is an area of future research.

As mentioned previously, our proof of statistical consistency under the MSC model assumes requires that the number of true gene trees to go to infinity, which is the equivalent of requiring that *both* the number of gene trees and the sequence length per gene tree go to infinity. Roch et al. [41] recently showed that essentially all gene tree summary methods (e.g., NJst [2], and ASTRAL [27]) are not statistically consistent under the MSC if the sequence length per gene is fixed — and these theoretical results apply to NJMerge as well. The failure to be statistically consistent when the sequence length per gene is bounded is not unique to gene tree summary methods or NJMerge, as Roch et al. also showed that fully partitioned maximum likelihood is not consistent under these conditions, and [42] had shown that unpartitioned maximum likelihood is also not consistent.

## Conclusions

In this paper, we introduced a divide-and-conquer approach to phylogeny estimation that 1) decomposes a set of species into pairwise disjoint subsets, 2) builds trees on each subset of species using a base method, and 3) merges the subsets trees together using a distance matrix. For the merger step, we presented a new method, called NJMerge, and proved that some divide-and-conquer pipelines using NJMerge are statistically consistent under some models of evolution. We then evaluated pipelines using NJMerge in the context of

species tree estimation, specifically using simulated multi-locus datasets with up to 1000 species and two levels of ILS. We found that pipelines using NJMerge provided several benefits to large-scale species tree estimation. Specifically, under some model conditions, pipelines using NJMerge improved the accuracy of traditional NJ and substantially reduced the running time of three popular species tree methods (ASTRAL-III, SVDquartets, and “concatenation” using RAxML) without sacrificing accuracy (see discussion for details as the results depended on the level of ILS). Finally, although NJMerge can fail to return a tree, in our experiments, pipelines using NJMerge failed on only 11 out of 2560 test cases. Together these results suggest that NJMerge is a promising approach for scaling highly accurate but computationally-intensive methods to larger datasets.

This study also suggests several different directions for future research. Since NJMerge uses a heuristic (which can fail) to test for tree compatibility (in deciding whether to accept a siblinghood proposal), a modification to NJMerge to use an exact method for this problem would reduce the failure rate and — if sufficiently fast — would still enable scalability to large datasets. In addition, all aspects of the divide-and-conquer pipeline could be modified and tested; for example, the robustness of NJMerge to the starting tree and initial subset decomposition could be evaluated. Finally, divide-and-conquer pipelines using NJMerge could be compared to traditional divide-and-conquer pipelines (e.g., Disk Covering Methods) when robust implementations become publically available for species tree estimation. Other agglomerative techniques for merging disjoint subset trees are being developed (e.g., the agglomerative technique described in [58] for gene tree estimation has good theoretical properties but has not yet been implemented), and NJMerge should be compared to such techniques when they become publically available.

## Funding

This work was supported by the U.S. National Science Foundation (award CCF-1535977) to TW. EKM was supported by the NSF Graduate Research Fellowship (award DGE-1144245) and the Ira and Debra Cohen Graduate Fellowship in Computer Science. Computational experiments were performed on Blue Waters. This research is part of the Blue Waters sustained-petascale computing project, which is supported by the NSF (awards OCI-0725070 and ACI-1238993) and the state of Illinois. Blue Waters is a joint effort of the University of Illinois at Urbana-Champaign and its National Center for Supercomputing Applications.

## References

- [1] A. V. Aho, Y. Sagiv, T. G. Szymanski, and J. D. Ullman. Inferring a Tree from Lowest Common Ancestors with an Application to the Optimization of Relational Expressions. *SIAM Journal on Computing*, 10(3):405–421, 1981.
- [2] E. S. Allman, J. H. Degnan, and J. A. Rhodes. Species Tree Inference from Gene Splits by Unrooted STAR Methods. *IEEE/ACM Transactions on Computational Biology and Bioinformatics*, 15(1):337–342, 2018.
- [3] E. S. Allman, C. Long, and J. A. Rhodes. Species tree inference from genomic sequences using the log-det distance, 2018.

- [4] K. Atteson. The Performance of Neighbor-Joining Methods of Phylogenetic Reconstruction. *Algorithmica*, 25(2-3):251–278, 1999.
- [5] M. S. Bansal, J. G. Burleigh, O. Eulenstein, and D. Fernández-Baca. Robinson-foulds supertrees. *Algorithms for Molecular Biology*, 5(1):18, 2010.
- [6] M. S. Bayzid, T. Hunt, and T. Warnow. Disk covering methods improve phylogenomic analyses. *BMC Genomics*, 15(6):S7, 2014.
- [7] H. L. Bodlaender, M. R. Fellows, and T. J. Warnow. Two strikes against perfect phylogeny. In *Automata, Languages and Programming: 19th International Colloquium Wien, Austria, July 13–17, 1992 Proceedings*, pages 273–283. Springer Berlin Heidelberg, Berlin, Heidelberg, 1992.
- [8] D. Bryant. On the Uniqueness of the Selection Criterion in Neighbor-Joining. *J. Classification*, 22:3–15, 2005.
- [9] J. Chifman and L. Kubatko. Quartet Inference from SNP Data Under the Coalescent Model. *Bioinformatics*, 30(23):3317–3324, 2014.
- [10] G. Dasarathy, R. Nowak, and S. Roch. Data Requirement for Phylogenetic Inference from Multiple Loci: A New Distance Method. *IEEE/ACM Trans. Comput. Biol. Bioinformatics*, 12(2):422–432, Mar. 2015.
- [11] S. V. Edwards. Is a new and general theory of molecular systematics emerging? *Evolution*, 63(1):1–19, 2009.
- [12] J. Felsenstein. Evolutionary trees from DNA sequences: A maximum likelihood approach. *Journal of Molecular Evolution*, 17(6):368–376, 1981.
- [13] W. Fletcher and Z. Yang. INDELible: A Flexible Simulator of Biological Sequence Evolution. *Molecular Biology and Evolution*, 26(8):1879–1888, 2009.
- [14] O. Gascuel. Concerning the NJ algorithm and its unweighted version, UNJ. In F. Roberts and A. Rzhetsky, editors, *Mathematical Hierarchies and Biology*, pages 149–170, Providence, 1997. American Mathematical Society.
- [15] J. Heled and A. J. Drummond. Bayesian Inference of Species Trees from Multilocus Data. *Molecular Biology and Evolution*, 27(3):570–580, 2010.
- [16] D. H. Huson, L. Vawter, and T. Warnow. Solving Large Scale Phylogenetic Problems Using DCM2. In *Proceedings of the Seventh International Conference on Intelligent Systems for Molecular Biology*, pages 118–129, Palo Alto, 1999. AAAI Press.
- [17] E. D. Jarvis, S. Mirarab, et al. Whole-genome analyses resolve early branches in the tree of life of modern birds. *Science*, 346(6215):1320–1331, 2014.
- [18] T. Jiang, P. Kearney, and M. Li. A Polynomial Time Approximation Scheme for Inferring Evolutionary Trees from Quartet Topologies and Its Application. *SIAM Journal on Computing*, 30(6):1942–1961, 2001.
- [19] T. Jiang, P. Kearney, and M. Li. A polynomial time approximation scheme for inferring evolutionary trees from quartet topologies and its application. *SIAM Journal on Computing*, 30(6):1942–1961, 2001.

- [20] T. H. Jukes and C. R. Cantor. Evolution of protein molecules. In H. Munro, editor, *Mammalian Protein Metabolism*, volume 3, pages 21–132. Academic Press, New York, 1969.
- [21] J. Lagergren. Combining polynomial running time and fast convergence for the disk-covering method. *Journal of Computer and System Science*, 65(3):481–493, 2002.
- [22] V. Lefort, R. Desper, and O. Gascuel. FastME 2.0: A Comprehensive, Accurate, and Fast Distance-Based Phylogeny Inference Program. *Molecular Biology and Evolution*, 32(10):2798–2800, 2015.
- [23] L. Liu and L. Yu. Estimating Species Trees from Unrooted Gene Trees. *Systematic Biology*, 60(5):661–667, 2011.
- [24] W. P. Maddison. Gene Trees in Species Trees. *Systematic Biology*, 46(3):523–536, 1997.
- [25] D. Mallo, L. De Oliveira Martins, and D. Posada. SimPhy : Phylogenomic Simulation of Gene, Locus, and Species Trees. *Systematic Biology*, 65(2):334–344, 2016.
- [26] S. Mirarab, N. Nguyen, S. Guo, L.-S. Wang, J. Kim, and T. Warnow. PASTA: Ultra-Large Multiple Sequence Alignment for Nucleotide and Amino-Acid Sequences. *Journal of Computational Biology*, 22(5):377–386, 2015.
- [27] S. Mirarab, R. Reaz, M. S. Bayzid, T. Zimmermann, M. S. Swenson, and T. Warnow. ASTRAL: genome-scale coalescent-based species tree estimation. *Bioinformatics*, 30(17):i541–i548, 2014.
- [28] S. Mirarab and T. Warnow. ASTRAL-II: coalescent-based species tree estimation with many hundreds of taxa and thousands of genes. *Bioinformatics*, 31(12):i44–i52, 2015.
- [29] D. S. Mitrinović. *Analytic Inequalities*. Springer-Verlag, New York, 1970.
- [30] E. K. Molloy and T. Warnow. NJMerge: A Generic Technique for Scaling Phylogeny Estimation Methods and Its Application to Species Trees. In M. Blanchette and A. Ouangraoua, editors, *Comparative Genomics. RECOMB-CG 2018. Lecture Notes in Computer Science*, volume 11183. Springer, Cham, 2018.
- [31] E. K. Molloy and T. Warnow. To Include or Not to Include: The Impact of Gene Filtering on Species Tree Estimation Methods. *Systematic Biology*, 67(2):285–303, 2018.
- [32] S. Nelesen, K. Liu, L.-S. Wang, C. R. Linder, and T. Warnow. DACTAL: divide-and-conquer trees (almost) without alignments. *Bioinformatics*, 28(12):i274–i282, 2012.
- [33] J. Neyman. Molecular Studies of Evolution: A Source of Novel Statistical Problems. In S. S. Gupta and J. Yackel, editors, *Statistical Decision Theory and Related Topics*, pages 1–27. Academic Press, Cambridge, 1971.
- [34] N. Nguyen, S. Mirarab, and T. Warnow. MRL and SuperFine+MRL: new supertree methods. *Algorithms for Molecular Biology*, 7(1):3, 2012.

- [35] H. A. Ogilvie, R. R. Bouckaert, and A. J. Drummond. StarBEAST2 Brings Faster Species Tree Inference and Accurate Estimates of Substitution Rates. *Molecular Biology and Evolution*, 34(8):2101–2114, 2017.
- [36] P. Pamilo and M. Nei. Relationships between gene trees and species trees. *Molecular Biology and Evolution*, 5(5):568–583, 1988.
- [37] M. N. Price, P. S. Dehal, and A. P. Arkin. FastTree 2 - Approximately Maximum-Likelihood Trees for Large Alignments. *PLOS ONE*, 5(3):1–10, 2010.
- [38] M. A. Ragan. Phylogenetic inference based on matrix representation of trees. *Molecular Phylogenetics and Evolution*, 1(1):53–58, 1992.
- [39] B. Rannala and Z. Yang. Bayes Estimation of Species Divergence Times and Ancestral Population Sizes Using DNA Sequences From Multiple Loci. *Genetics*, 164(4):1645–1656, 2003.
- [40] D. Robinson and L. Foulds. Comparison of phylogenetic trees. *Mathematical Biosciences*, 53(1):131–147, 1981.
- [41] S. Roch, M. Nute, and T. Warnow. Long-Branch Attraction in Species Tree Estimation: Inconsistency of Partitioned Likelihood and Topology-Based Summary Methods. *Systematic Biology*, page syy061, 2018.
- [42] S. Roch and M. Steel. Likelihood-based tree reconstruction on a concatenation of aligned sequence data sets can be statistically inconsistent. *Theoretical Population Biology*, 100:56–62, 2015.
- [43] N. Saitou and M. Nei. The neighbor-joining method: a new method for reconstructing phylogenetic trees. *Molecular Biology and Evolution*, 4(4):406–425, 1987.
- [44] A. Stamatakis. RAxML version 8: a tool for phylogenetic analysis and post-analysis of large phylogenies. *Bioinformatics*, 30(9):1312–1313, 2014.
- [45] M. Steel. The complexity of reconstructing trees from qualitative characters and subtrees. *Journal of Classification*, 9(1):91–116, 1992.
- [46] M. Steel. Recovering a tree from the leaf colourations it generates under a Markov model. *Applied Mathematics Letters*, 7(2):19–24, 1994.
- [47] J. Sukumaran and M. T. Holder. DendroPy: a Python library for phylogenetic computing. *Bioinformatics*, 26(12):1569–1571, 2010.
- [48] M. S. Swenson, R. Suri, C. R. Linder, and T. Warnow. An experimental study of Quartets MaxCut and other supertree methods. *Algorithms for Molecular Biology*, 6(1):7, 2011.
- [49] D. L. Swofford. PAUP\* (\*Phylogenetic Analysis Using PAUP), Version 4a161, 2018.
- [50] S. Tavaré. Some probabilistic and statistical problems in the analysis of DNA sequences. *Lectures on mathematics in the life sciences*, 17(2):57–86, 1986.
- [51] P. Vachaspati and T. Warnow. ASTRID: Accurate Species TREes from Internode Distances. *BMC Genomics*, 16(10):S3, 2015.

- [52] T. Warnow. Tree Compatibility and Inferring Evolutionary History. *Journal of Algorithms*, 16(3):388–407, 1994.
- [53] T. Warnow. *Computational Phylogenetics: An Introduction to Designing Methods for Phylogeny Estimation*. Cambridge University Press, Cambridge UK, 2017.
- [54] T. Warnow. Supertree Construction: Opportunities and Challenges. *ArXiv e-prints*, May 2018.
- [55] T. Warnow, B. M. E. Moret, and K. St. John. Absolute Convergence: True Trees from Short Sequences. In *Proceedings of the Twelfth Annual ACM-SIAM Symposium on Discrete Algorithms*, SODA '01, pages 186–195, Philadelphia, PA, USA, 2001. Society for Industrial and Applied Mathematics.
- [56] B. Xu and Z. Yang. Challenges in Species Tree Estimation Under the Multispecies Coalescent Model. *Genetics*, 204(4):1353–1368, 2016.
- [57] C. Zhang, M. Rabiee, E. Sayyari, and S. Mirarab. ASTRAL-III: polynomial time species tree reconstruction from partially resolved gene trees. *BMC Bioinformatics*, 19(6):153, 2018.
- [58] Q. R. Zhang, S. Rao, and T. J. Warnow. New absolute fast converging phylogeny estimation methods with improved scalability and accuracy. In *18th International Workshop on Algorithms in Bioinformatics, WABI 2018, August 20-22, 2018, Helsinki, Finland*, pages 8:1–8:12, 2018.



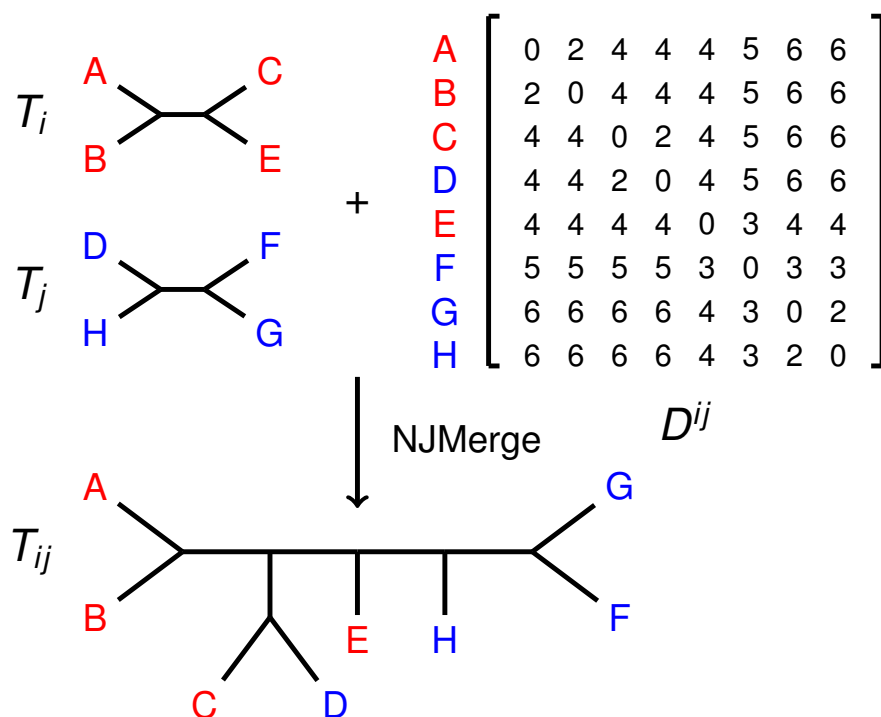

Figure 1: **NJMerge Input/Output Example.** In this example, NJMerge is given two constraint trees ( $T_i$  and  $T_j$ ) and a distance matrix  $D^{ij}$  that is additive for the tree  $((((A, B), (C, D)), E), (F, (G, H)))$ . NJMerge returns a compatibility supertree, called  $T_{ij}$ , for the two constraint trees ( $T_i$  and  $T_j$ ). Note that Neighbor Joining (NJ) applied to the distance matrix  $D^{ij}$  would return  $((((A, B), (C, D)), E), (F, (G, H)))$  [4]; however, NJMerge rejects the siblinghood proposal  $(G, H)$ , because it violates constraint tree  $T_j$ . Instead, NJMerge makes  $G$  and  $F$  siblings.

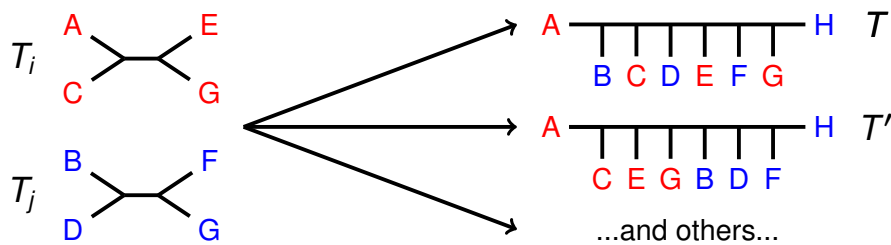

Figure 2: **Compatibility Supertree Example.** In this example, two compatibility supertrees for  $\mathcal{T} = \{T_i, T_j\}$  are shown. Note that the trees in  $\mathcal{T}$  form clades in  $T'$  but do not form clades in  $T$ . Other compatibility supertrees for  $\mathcal{T}$  exist.

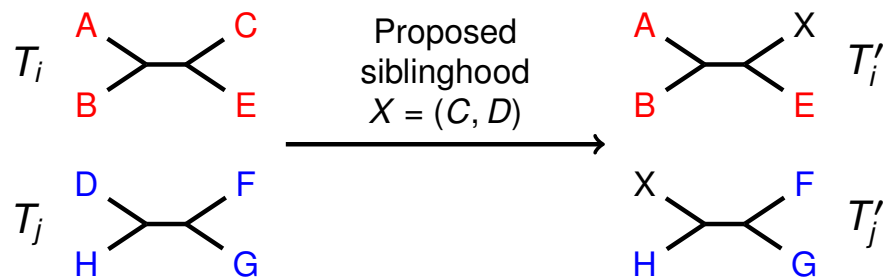

**Figure 3: NJMerge Siblinghood Proposal Example.** In this example, NJMerge evaluates the siblinghood proposal  $(C, D)$ . Because  $C \in T_i$  and  $D \in T_j$ , NJMerge first updates the constraint trees  $T_i$  and  $T_j$  based on the proposed siblinghood to get  $T'_i$  and  $T'_j$ . Specifically, both  $C \in T_i$  and  $D \in T_j$  are replaced by  $X$ , representing the siblinghood  $(C, D)$ . The compatibility of the updated constraint trees can be tested by rooting the trees at leaf  $X$  and using the algorithm proposed in [1]. Because the updated constraint trees ( $T'_i$  and  $T'_j$ ) are indeed compatible, NJMerge will accept siblinghood proposal. Importantly, when NJMerge evaluates the next siblinghood proposal, the two constraint trees will no longer be on disjoint leaf sets.

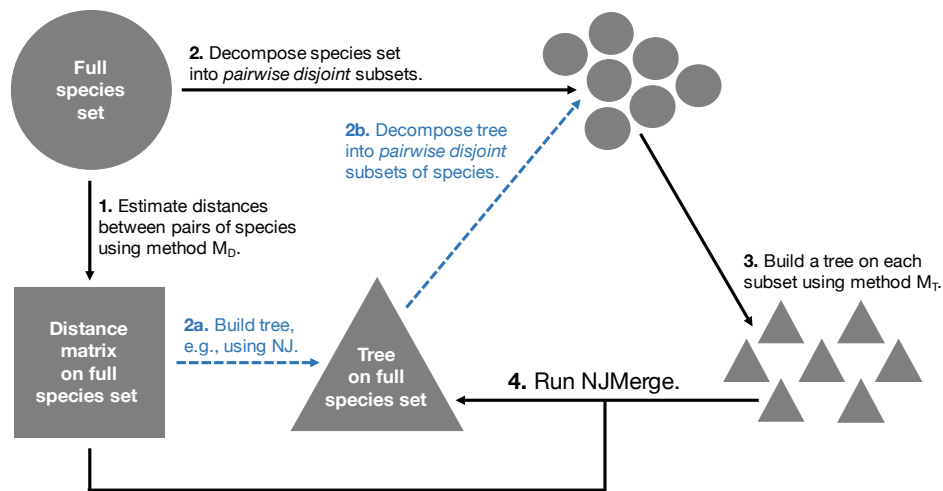

Figure 4: **Divide-and-Conquer Pipeline using NJMerge.** We present a divide-and-conquer pipeline that operates by 1) estimating distances between pairs of species using method  $M_D$ , 2) decomposing the species set into pairwise disjoint subsets, 3) building a tree on each subset using method  $M_T$ , and 4) merging trees together using the distance matrix using NJMerge. Step 2 can be performed by estimating a tree from the distance matrix (e.g., using NJ) and then decomposing this tree into pairwise disjoint subsets of species (shown in blue). Although not explored in this study, this pipeline can be run in an iterative fashion by using the tree produced in Step 4 to define the next subset decomposition. In this schematic, sets of species are represented by circles, distance matrices are represented by squares, and trees are represented by triangles.

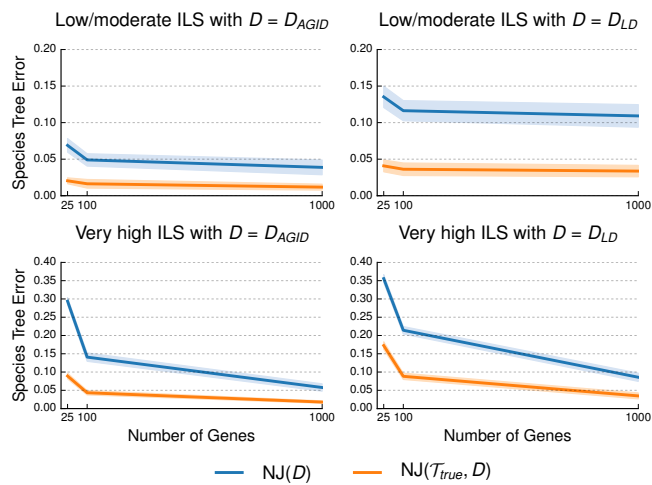

Figure 5: **Impact of estimated distance matrix on Neighbor Joining (NJ) and NJMerge.** Neighbor Joining (NJ) and NJMerge was run with two different distance matrices (see the Performance Study section for more information on the notation), and NJMerge was run with constraint trees that agreed with the true species tree. Datasets had two difference levels of incomplete lineage sorting (ILS) and numbers of genes varying from 25 to 1000. Species tree estimation error is defined as the normalized Robinson-Foulds (RF) distance between true and estimated species trees. Lines represent the average over replicate datasets, and filled regions indicate the standard error.

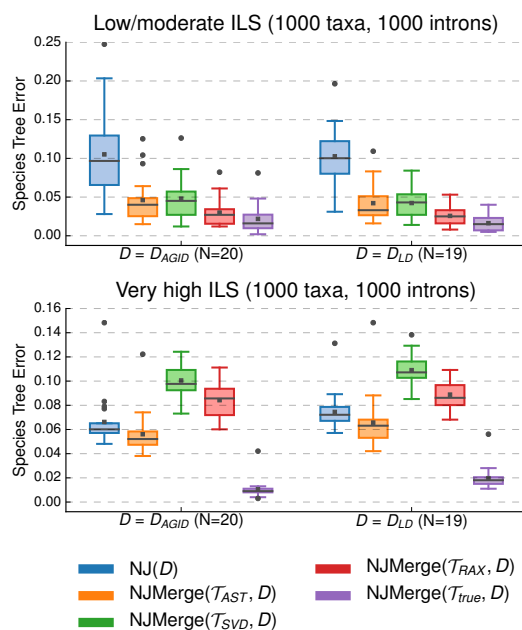

Figure 6: **Impact of estimated constraint trees on NJMerge.** Neighbor Joining (NJ) was run with two different distance matrices, and NJMerge was run with two different distance matrices and four different sets of constraint trees (see the Performance Study section for more information on the notation). Species tree estimation error is defined as the normalized Robinson-Foulds (RF) distance between true and estimated species trees. Note that gray bars represent medians, gray squares represent means, gray circles represent outliers, box plots are defined by quartiles (extending from the first to the third quartiles), and whiskers extend to plus/minus 1.5 times the interquartile distance (unless greater/less than the maximum/minimum value).

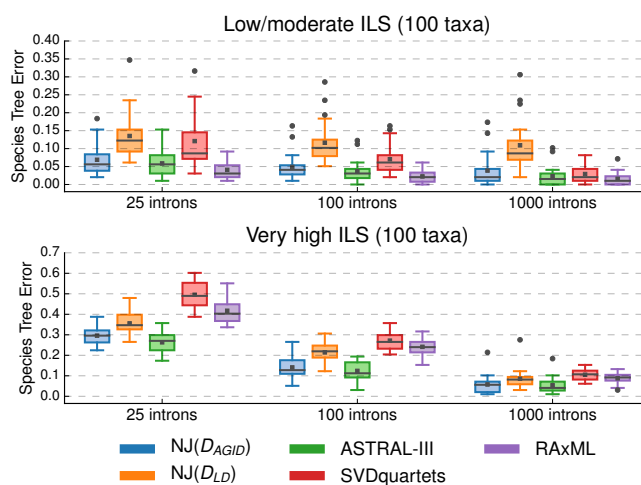

Figure 7: **Comparison of species tree methods.** Species tree estimation error is defined as the normalized Robinson-Foulds (RF) distance between true and estimated species trees. Neighbor Joining (NJ) was run with two different distance matrices; see the Performance Study section for more information on the notation. Note that gray bars represent medians, gray squares represent means, gray circles represent outliers, box plots are defined by quartiles (extending from the first to the third quartiles), and whiskers extend to plus/minus 1.5 times the interquartile distance (unless greater/less than the maximum/minimum value).



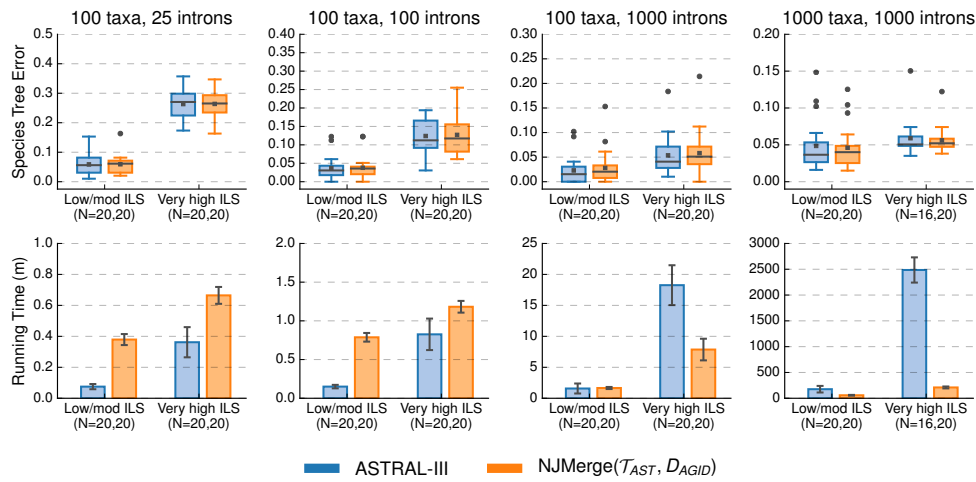

Figure 8: **ASTRAL vs. NJMerge given ASTRAL constraint trees and average gene tree internode distance (AGID) matrix.** Subplots on top row show species tree estimation error (defined as the normalized RF distance between true and estimated species trees); note that gray bars represent medians, gray squares represent means, gray circles represent outliers, box plots are defined by quartiles (extending from the first to the third quartiles), and whiskers extend to plus/minus 1.5 times the interquartile distance (unless greater/less than the maximum/minimum value). Subplots on bottom row show running time (in minutes); bars represent means and error bars represent standard deviations across replicate datasets. NJMerge running times is for computing the subset trees “in serial”; see Equation (1) in the main text for more information. The numbers of replicates on which the methods completed is shown on the x-axis, e.g.,  $N = X, Y$  indicates that ASTRAL completed on  $X$  out of 20 replicates and that NJMerge( $\mathcal{T}_{AST}, D_{AGID}$ ) completed on  $Y$  out of 20 replicates. ASTRAL did not complete within the maximum wall-clock time of 48 hours on 4/40 intron-like datasets with 1000 taxa and very high ILS.

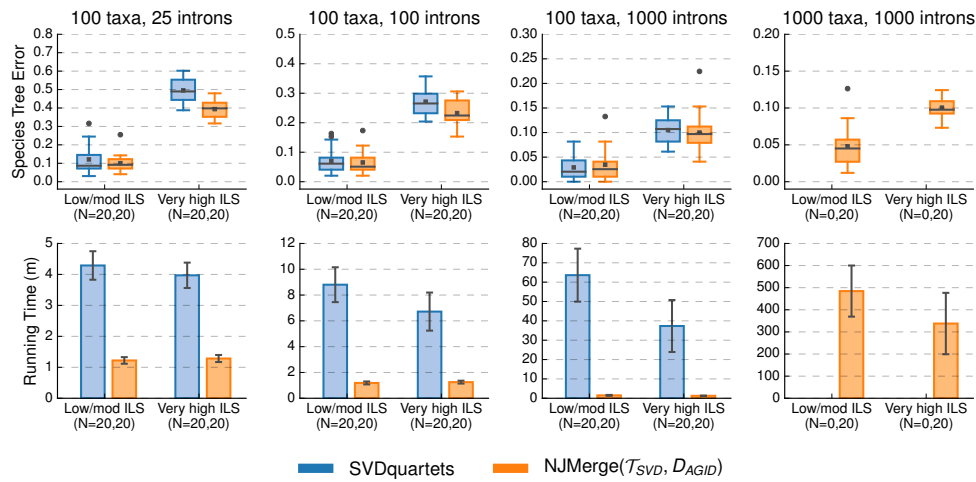

Figure 9: **SVDquartets vs. NJMerge given SVDquartet constraint trees and average gene tree internode distance (AGID) matrix.** Subplots on top row show species tree estimation error (defined as the normalized RF distance between true and estimated species trees); note that gray bars represent medians, gray squares represent means, gray circles represent outliers, box plots are defined by quartiles (extending from the first to the third quartiles), and whiskers extend to plus/minus 1.5 times the interquartile distance (unless greater/less than the maximum/minimum value). Subplots on bottom row show running time (in minutes); bars represent means and error bars represent standard deviations across replicate datasets. NJMerge running times is for computing the subset trees “in serial”; see Equation (1) in the main text for more information. The numbers of replicates on which the methods completed is shown on the x-axis, e.g.,  $N = X, Y$  indicates that SVDquartets completed on  $X$  out of 20 replicates and that NJMerge( $T_{SVD}, D_{AGID}$ ) completed on  $Y$  out of 20 replicates. SVDquartets did not run any datasets with 1000 taxa due to segmentation faults.

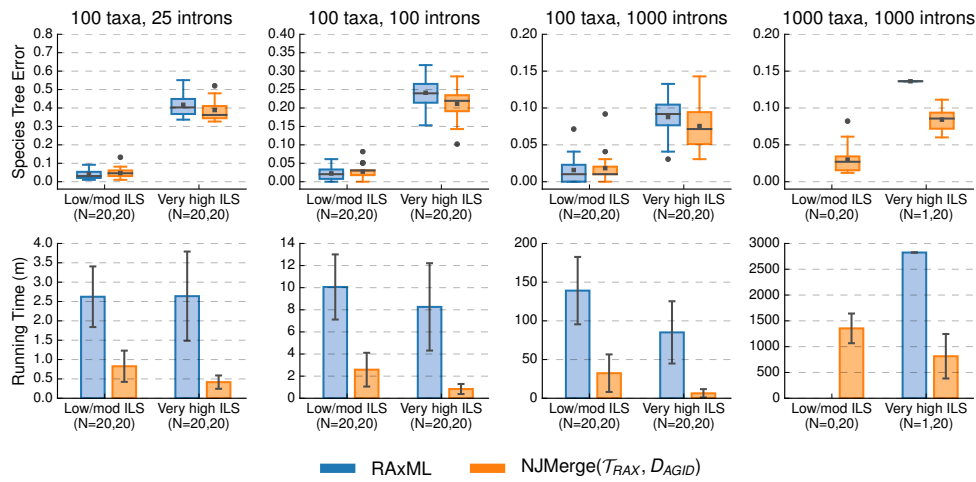

Figure 10: **RAxML vs. NJMerge given RAxML constraint trees and average gene tree internode distance (AGID) matrix.** Subplots on top row show species tree estimation error (defined as the normalized RF distance between true and estimated species trees); note that gray bars represent medians, gray squares represent means, gray circles represent outliers, box plots are defined by quartiles (extending from the first to the third quartiles), and whiskers extend to plus/minus 1.5 times the interquartile distance (unless greater/less than the maximum/minimum value). Subplots on bottom row show running time (in minutes); bars represent means and error bars represent standard deviations across replicate datasets. NJMerge running times is for computing the subset trees “in serial”; see Equation (1) in the main text for more information. The numbers of replicates on which the methods completed is shown on the x-axis, e.g.,  $N = X, Y$  indicates that RAxML completed on  $X$  out of 20 replicates and that NJMerge( $T_{RAX}, D_{AGID}$ ) completed on  $Y$  out of 20 replicates. RAxML was only able to run on 1/40 intron-like datasets with 1000 taxa due to “Out of Memory” errors.

Table 1: The number of datasets on which methods failed is indicated below by model condition. ASTRAL-III failed due to running beyond the maximum wall clock time of 48 hours; SVDquartets failed due to segmentation faults; RAxML failed due to running out of memory; NJMerge failed due to being unable to find a legal siblinghood. Note that NJMerge is described by the input set  $\mathcal{T}$  of constraint trees and input distance matrix  $D$ ; see the Performance Study section for more information on the notation.

| # of Taxa | # of Genes | ILS Level    | Sequence Type | Method                                    | # of Failures (out of 20) |
|-----------|------------|--------------|---------------|-------------------------------------------|---------------------------|
| 100       | 25         | very high    | exon          | NJMerge( $\mathcal{T}_{true}, D_{LD}$ )   | 1                         |
| 100       | 25         | very high    | exon          | NJMerge( $\mathcal{T}_{RAX}, D_{AGID}$ )  | 1                         |
| 100       | 25         | very high    | intron        | NJMerge( $\mathcal{T}_{true}, D_{AGID}$ ) | 1                         |
| 1000      | 1000       | low/moderate | exon          | SVDquartets                               | 20                        |
| 1000      | 1000       | low/moderate | exon          | RAxML                                     | 3                         |
| 1000      | 1000       | low/moderate | intron        | NJMerge( $\mathcal{T}_{AST}, D_{LD}$ )    | 1                         |
| 1000      | 1000       | low/moderate | intron        | SVDquartets                               | 20                        |
| 1000      | 1000       | low/moderate | intron        | RAxML                                     | 20                        |
| 1000      | 1000       | very high    | exon          | ASTRAL-III                                | 19                        |
| 1000      | 1000       | very high    | exon          | NJMerge( $\mathcal{T}_{true}, D_{LD}$ )   | 1                         |
| 1000      | 1000       | very high    | exon          | NJMerge( $\mathcal{T}_{AST}, D_{LD}$ )    | 1                         |
| 1000      | 1000       | very high    | exon          | NJMerge( $\mathcal{T}_{SVD}, D_{LD}$ )    | 2                         |
| 1000      | 1000       | very high    | exon          | NJMerge( $\mathcal{T}_{RAX}, D_{LD}$ )    | 2                         |
| 1000      | 1000       | very high    | exon          | SVDquartets                               | 20                        |
| 1000      | 1000       | very high    | intron        | ASTRAL-III                                | 4                         |
| 1000      | 1000       | very high    | intron        | NJMerge( $\mathcal{T}_{SVD}, D_{LD}$ )    | 1                         |
| 1000      | 1000       | very high    | intron        | SVDquartets                               | 20                        |
| 1000      | 1000       | very high    | intron        | RAxML                                     | 19                        |
