# Supplementary material for: Statistically consistent divide-and-conquer pipelines for phylogeny estimation using NJMerge
Source: bioRxiv or medRxiv preprint supplement (doi:10.1101/469130), 2019-04-21
Supplement: Supplementary file [file 469130-1.pdf]

# Statistically consistent divide-and-conquer pipelines for phylogeny estimation using NJMerge

## SUPPLEMENTARY MATERIALS

Erin K. Molloy and Tandy Warnow

November 12, 2018

### Contents

|                        |           |
|------------------------|-----------|
| <b>List of Tables</b>  | <b>1</b>  |
| <b>List of Figures</b> | <b>1</b>  |
| <b>References</b>      | <b>22</b> |

### List of Tables

|    |                                                                        |    |
|----|------------------------------------------------------------------------|----|
| S1 | INDELible Simulation Parameters . . . . .                              | 2  |
| S2 | Simulated Dataset Properties . . . . .                                 | 4  |
| S3 | Gene Tree Median Branch Lengths . . . . .                              | 4  |
| S4 | Method Failures . . . . .                                              | 5  |
| S5 | Species tree error for NJMerge given AGID matrix . . . . .             | 18 |
| S6 | Species tree error for NJMerge given log-det distance matrix . . . . . | 19 |
| S7 | Running times for NJMerge given AGID matrix . . . . .                  | 20 |
| S8 | Running times for NJMerge given log-det distance matrix . . . . .      | 21 |

### List of Figures

|     |                                                                                                        |    |
|-----|--------------------------------------------------------------------------------------------------------|----|
| S1  | Impact of distance matrix on NJMerge for exon-like datasets . . . . .                                  | 6  |
| S2  | Impact of estimated constraint trees on NJMerge for exon-like datasets . . . . .                       | 7  |
| S3  | Comparison of species tree methods for exon-like datasets . . . . .                                    | 8  |
| S4  | Comparison ASTRAL and NJMerge given AGID matrix for exon-like datasets . . . . .                       | 9  |
| S5  | Comparison of SVDquartets and NJMerge given AGID matrix) for exon-like datasets . . . . .              | 10 |
| S6  | Comparison RAxML of NJMerge given AGID matrix for exon-like datasets . . . . .                         | 11 |
| S7  | Comparison ASTRAL and NJMerge given log-det distance matrix for intron-like datasets . . . . .         | 12 |
| S8  | Comparison of ASTRAL and NJMerge given log-det distance matrix for exon-like datasets . . . . .        | 13 |
| S9  | Comparison of SVDquartets and NJMerge given log-det distance matrix for intron-like datasets . . . . . | 14 |
| S10 | Comparison of SVDquartets and NJMerge given log-det distance matrix for exon-like datasets . . . . .   | 15 |
| S11 | Comparison of RAxML and NJMerge given log-det distance matrix for intron-like datasets . . . . .       | 16 |
| S12 | Comparison of RAxML and NJMerge given log-det distance matrix for exon-like datasets . . . . .         | 17 |

# Supplementary Methods

## Simulation Command

SimPhy [9] Version 1.0.2 was run as

```
simphy -rs 3000 -rl F:3000 -rg 1 -st F:[species tree height] \  
-si F:1 -sl F:[number of taxa] -sb F:0.0000001 -sp F:200000 \  
-hs LN:1.5,1 -hl LN:1.2,1 -hg LN:1.4,1 -su E:10000000 \  
-so F:1 -od 1 -v 3 -cs 293745 -o [output directory name]
```

where the number of taxa was 100 or 1000, the species tree height was 10,000,000 or 500,000 generations, and the effective population size was constant at 200,000.

## INDELible Simulation

Like the simulation in [11], GTR+ $\Gamma$  model parameters (base frequencies, substitution rates, and alpha) were drawn from distributions. However, unlike the simulation in [11], we estimated separate distributions for exons, introns, and ultra-conserved elements (UCEs) from the Avian Phylogenomics Dataset [6]. We ran INDELible [5] Version 1.03 using custom Python scripts available on the Illinois Data Bank using the exon, intron, and UCE parameter distributions for genes 1-1000, 1001-2000, and 2001-3000, respectively. Only the exon-like and intron-like genes were used in this study due to limitations in computational resources. Data were simulated for this study using the protocol presented in [11].

**Table S1: INDELible Simulation Parameters.** We report the distributions from which GTR+ $\Gamma$  model parameters were drawn to simulate sequences with INDELible.

| Sequence Type | GTR Base Frequencies   | GTR Substitution Rates         | Gamma Parameter $\alpha$ |
|---------------|------------------------|--------------------------------|--------------------------|
| From [11]     | Dirichlet(36,26,28,32) | Dirichlet(16,3,5,5,6,15)       | 1.2                      |
| Exon          | Dirichlet(79,57,60,53) | Dirichlet(3,9,2,4,11,7)        | 4.2                      |
| Intron        | Dirichlet(55,38,43,63) | Dirichlet(37,133,20,48,120,29) | 0.4                      |
| UCE           | Dirichlet(68,45,45,68) | Dirichlet(19,66,10,27,67,19)   | 1.0                      |

## Average Gene-Tree Internode Distance Matrix Commands

FastTree [13] Version 2.1.10 (SSE3) was run as

```
FastTree -nt -gtr -quiet -log fasttree-$gene.log \  
[input alignment fasta file] > [output FastTree-2 tree file]
```

ASTRID [19] Version 1.4 was run as

```
ASTRID -i [input gene tree list file] \  
-c [output distance matrix file] -o [temporary file]
```

## LogDet Distance Matrix Command

PAUP\* [18] 4a163 64-bit Centos was run as

```
echo "ToNEXUS format=FASTA fromFile=[input alignment fasta file]  
toFile=[alignment nexus file]; exe [alignment nexus file]; DSet distance=logdet;  
SaveDist format=PHYLIP file=[output distance matrix file] triangle=both diagonal=yes;" |  
paup4a163_centos64 -n
```

## Species Tree Commands

ASTRAL [20] Version 5.6.1 (i.e., ASTRAL-III) was run as

```
java java -Xms3200M -Xmx32000M ASTRAL/Astral/astral.5.6.1.jar \  
-i [input gene tree list file] -o [output ASTRAL-III tree file]
```

SVDquartets [3, 4] (PAUP\* [18] Version 4a161/3) was run as

```
echo "exe [input alignment nexus file]; svd nthreads=16  
evalQuartets=all qfile=[output quartet file] qformat=qmc;  
savetrees file=[output SVDquartets tree file] format=newick;" |  
paup4a161_centos64 -n
```

PAUP\* [18] Version 4a161 64-bit Centos was used for results obtained in [12], and PAUP\* Version 4a163 64-bit Centos was used for results obtained using log-det distance matrix.

RAxML [15] Version 8.2.12 (with pThreads SSE3) was run as

```
raxmlHPC-PTHREADS-SSE3 -m GTRGAMMA -F -p [seed] \  
-n [output name] -s [input alignment file] -T 16
```

Note that the option `-j` (to write checkpoints) was included for the 1000-taxon datasets only.

## NJ / NJMerge Commands

Neighbor Joining (FastME [7] Version 2.1.5) was run as

```
fastme -mN -i [input distance matrix file] -o [output tree file]
```

NJMerge was run as

```
python njmerge.py \  
-t [input constraint tree file 1] ... [input constraint tree file N] \  
-m [input internode distance matrix file] \  
-x [input rows to taxon name map file] \  
-o [output NJMerge tree file]
```

## Tree Comparison Commands

Normalized RF distances were computed using Dendropy [17] Version 4.3.0 as

```
n1 = len(t1.internal_edges(exclude_seed_edge=True))  
n2 = len(t2.internal_edges(exclude_seed_edge=True))  
[fp, fn] = false_positives_and_negatives(t1, t2)  
rf = float(fp + fn) / (n1 + n2)
```

where `t1` and `t2` are Dendropy tree objects.

## Simulated Datasets

Table S2: **Simulated Dataset Properties.** Simulated datasets are described by the average discord between the species tree and the gene trees as well as the gene tree estimation error. Specifically, “Average Distance” is the normalized Robinson-Foulds or RF [14] distance between the true species tree and the true gene tree, averaged across all 1000 genes in a replicate dataset. “Gene Tree Estimation Error” is the normalized RF distance between the true and the estimated gene trees, averaged across all 1000 genes in a replicate dataset. “Total Gene Tree Discord” is the normalized RF distance between the true species tree and the estimated gene tree, averaged across all 1000 genes in a replicate dataset. Values below are the mean ( $\pm$  standard deviation) across 20 replicates.

| Number of Taxa                                                | Sequence Type | Average Distance | Gene Tree Estimation Error | Total Gene Tree Discord |
|---------------------------------------------------------------|---------------|------------------|----------------------------|-------------------------|
| <i>Moderate ILS (species tree height = 10M generations)</i>   |               |                  |                            |                         |
| 100                                                           | exon          | $0.08 \pm 0.02$  | $0.38 \pm 0.06$            | $0.39 \pm 0.06$         |
| 100                                                           | intron        | $0.08 \pm 0.02$  | $0.26 \pm 0.07$            | $0.28 \pm 0.06$         |
| 1000                                                          | exon          | $0.10 \pm 0.00$  | $0.42 \pm 0.04$            | $0.43 \pm 0.04$         |
| 1000                                                          | intron        | $0.10 \pm 0.00$  | $0.30 \pm 0.05$            | $0.32 \pm 0.05$         |
| <i>Very High ILS (species tree height = 500K generations)</i> |               |                  |                            |                         |
| 100                                                           | exon          | $0.68 \pm 0.02$  | $0.57 \pm 0.07$            | $0.78 \pm 0.03$         |
| 100                                                           | intron        | $0.68 \pm 0.02$  | $0.43 \pm 0.10$            | $0.74 \pm 0.03$         |
| 1000                                                          | exon          | $0.69 \pm 0.01$  | $0.64 \pm 0.05$            | $0.81 \pm 0.02$         |
| 1000                                                          | intron        | $0.69 \pm 0.01$  | $0.51 \pm 0.07$            | $0.76 \pm 0.03$         |

Table S3: **Gene Tree Median Branch Lengths.** For the first replicate dataset in each model condition, we computed the median branch length per gene tree for the internal branches as well as the terminal branches, separately. Values below are the mean ( $\pm$  standard deviation) across 1000 gene trees.

| Number of Taxa                                                | Sequence Type | Internal Branch Lengths | Terminal Branch Lengths |
|---------------------------------------------------------------|---------------|-------------------------|-------------------------|
| <i>Moderate ILS (species tree height = 10M generations)</i>   |               |                         |                         |
| 100                                                           | exon          | $0.0317 \pm 0.0235$     | $0.0588 \pm 0.0436$     |
| 100                                                           | intron        | $0.0317 \pm 0.0229$     | $0.0585 \pm 0.0425$     |
| 1000                                                          | exon          | $0.0255 \pm 0.0184$     | $0.0527 \pm 0.0378$     |
| 1000                                                          | intron        | $0.0260 \pm 0.0189$     | $0.0535 \pm 0.0389$     |
| <i>Very High ILS (species tree height = 500K generations)</i> |               |                         |                         |
| 100                                                           | exon          | $0.0012 \pm 0.0009$     | $0.0072 \pm 0.0051$     |
| 100                                                           | intron        | $0.0012 \pm 0.0010$     | $0.0073 \pm 0.0055$     |
| 1000                                                          | exon          | $0.0010 \pm 0.0007$     | $0.0073 \pm 0.0053$     |
| 1000                                                          | intron        | $0.0009 \pm 0.0007$     | $0.0066 \pm 0.0048$     |

## Approximation of Running Time for Gene Tree Estimation

In order to approximate the running time for gene tree estimation, we ran FastTree-2 on each gene tree in the first replicate dataset for all model conditions. The average time for FastTree-2 per gene tree was 5.1 seconds for the 100-taxon datasets and 62.5 seconds for the 1000-taxon datasets. Because we ran FastTree-2 with only one thread, we could estimate 16 gene trees simultaneously; thus, we approximated of the total running time as the number of genes times the average running time per gene tree divided by the number of threads.

## Supplementary Results

We often specify the inputs when referring to Neighbor Joining (NJ) and NJMerge. For example,  $\text{NJ}(D_{AGID})$  refers to NJ given the average gene-tree internode distance (AGID) matrix as input, and  $\text{NJMerge}(\mathcal{T}_{RAX}, D_{AGID})$  refers to NJMerge given the constraint trees estimated using RAxML and the AGID matrix as input.

Distance matrices were created using two different approaches.

- $D_{AGID}$  refers to the Average Gene-tree Internode Distance matrix (as described in [8]) from estimated gene trees using ASTRID [19] Version 1.4.
- $D_{LD}$  refers to the logdet distance matrix (as described in [16]) and computed from concatenated alignment using PAUP\* [18].

Constraint trees were created using four different approaches.

- $\mathcal{T}_{true}$  refers to constraint trees computed by restricting the true species tree to each subset of species.
- $\mathcal{T}_{AST}$  refers to constraint trees computed by running ASTRAL-III on each subset, i.e., on estimated gene trees restricted to subsets of species.
- $\mathcal{T}_{SVD}$  refers to constraint trees computed by running SVDquartets on each subset, i.e., on the concatenated alignment restricted to subsets of species.
- $\mathcal{T}_{RAX}$  refers to constraint trees computed by running RAxML on each subset, i.e., on the concatenated alignment restricted to subsets of species.

Table S4: **Method Failures.** Methods were run on 20 replicate datasets for each model condition with 1000 species, 1000 genes, two levels of ILS (species tree heights: 10M and 500K), and two sequence types (exon and intron). All four methods (ASTRAL-III, SVDquartets, RAxML, and NJMerge) failed on some datasets, as recorded below. ASTRAL-III failed due to running beyond the maximum wall clock time of 48 hours; SVDquartets failed due to segmentation faults; RAxML failed due to running out of memory, and NJMerge failed due to being unable to find a legal siblinghood.

| # of Taxa | # of Genes | Species Tree Height | Data Type | Method                                         | Fraction of Replicates | Replicate Numbers |
|-----------|------------|---------------------|-----------|------------------------------------------------|------------------------|-------------------|
| 100       | 25         | 500K                | exon      | $\text{NJMerge}(\mathcal{T}_{true}, D_{LD})$   | 1/20                   | 10                |
| 100       | 25         | 500K                | exon      | $\text{NJMerge}(\mathcal{T}_{RAX}, D_{AGID})$  | 1/20                   | 16                |
| 100       | 25         | 500K                | intron    | $\text{NJMerge}(\mathcal{T}_{true}, D_{AGID})$ | 1/20                   | 6                 |
| 1000      | 1000       | 10M                 | exon      | SVDquartets                                    | 20/20                  | All               |
| 1000      | 1000       | 10M                 | exon      | RAxML                                          | 3/20                   | 2, 8, 17          |
| 1000      | 1000       | 10M                 | intron    | $\text{NJMerge}(\mathcal{T}_{AST}, D_{LD})$    | 1/20                   | 20                |
| 1000      | 1000       | 10M                 | intron    | SVDquartets                                    | 20/20                  | All               |
| 1000      | 1000       | 10M                 | intron    | RAxML                                          | 20/20                  | All               |
| 1000      | 1000       | 500K                | exon      | ASTRAL-III                                     | 19/20                  | All except 15     |
| 1000      | 1000       | 500K                | exon      | $\text{NJMerge}(\mathcal{T}_{true}, D_{LD})$   | 1/20                   | 18                |
| 1000      | 1000       | 500K                | exon      | $\text{NJMerge}(\mathcal{T}_{AST}, D_{LD})$    | 1/20                   | 18                |
| 1000      | 1000       | 500K                | exon      | $\text{NJMerge}(\mathcal{T}_{SVD}, D_{LD})$    | 2/20                   | 14, 18            |
| 1000      | 1000       | 500K                | exon      | $\text{NJMerge}(\mathcal{T}_{RAX}, D_{LD})$    | 2/20                   | 14, 18            |
| 1000      | 1000       | 500K                | exon      | SVDquartets                                    | 20/20                  | All               |
| 1000      | 1000       | 500K                | intron    | ASTRAL-III                                     | 4/20                   | 1, 5, 6, 20       |
| 1000      | 1000       | 500K                | intron    | $\text{NJMerge}(\mathcal{T}_{SVD}, D_{LD})$    | 1/20                   | 6                 |
| 1000      | 1000       | 500K                | intron    | SVDquartets                                    | 20/20                  | All               |
| 1000      | 1000       | 500K                | intron    | RAxML                                          | 19/20                  | All except 6      |

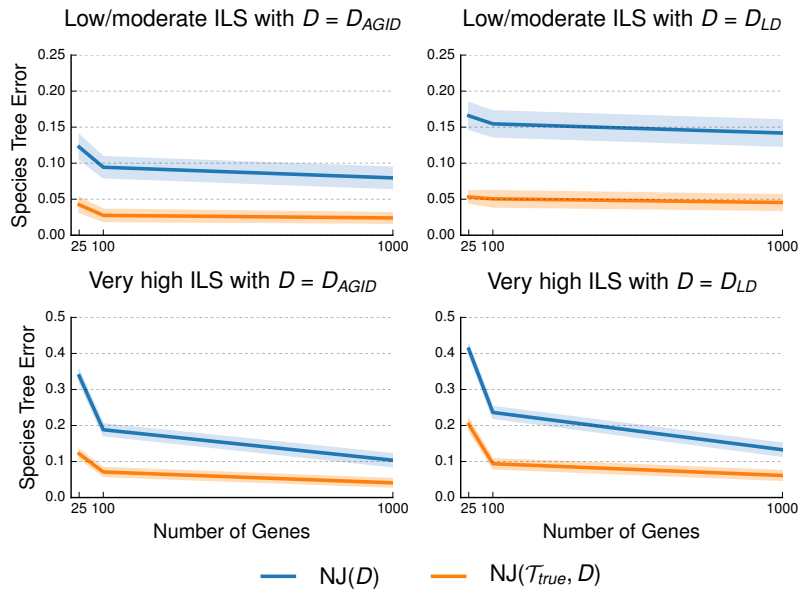

Figure S1: **Impact of distance matrix on NJMerge for 100-taxon, exon-like datasets.** Neighbor Joining (NJ) and NJMerge was run with two different distance matrices (see the notation section above for details), and NJMerge was run with constraint trees that agreed with the true species tree. Datasets had two difference levels of incomplete lineage sorting (ILS) and numbers of genes varying from 25 to 1000. Species tree estimation error is defined as the normalized Robinson-Foulds (RF) distance between true and estimated species trees. Lines represent the average over replicate datasets, and filled regions indicate the standard error.

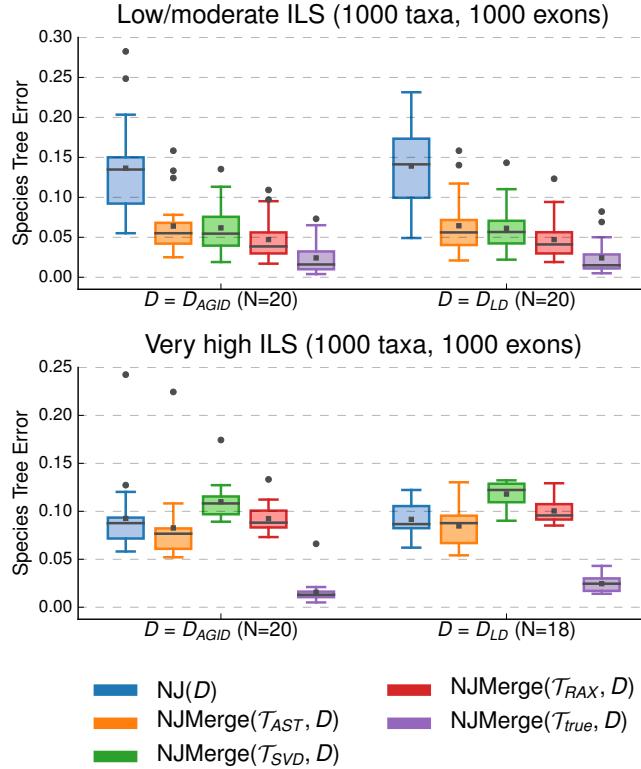

Figure S2: **Impact of constraint trees on NJMerge for 1000-taxon, exon-like datasets.** Neighbor Joining (NJ) was run with two different distance matrices, and NJMerge was run with two difference distance matrices and four different sets of constraint trees; see notation section above for details. Species tree estimation error is defined as the normalized Robinson-Foulds (RF) distance between true and estimated species trees. Note that gray bars represent medians, gray squares represent means, gray circles represent outliers, box plots are defined by quartiles (extending from the first to the third quartiles), and whiskers extend to plus/minus 1.5 times the interquartile distance (unless greater/less than the maximum/minimum value).

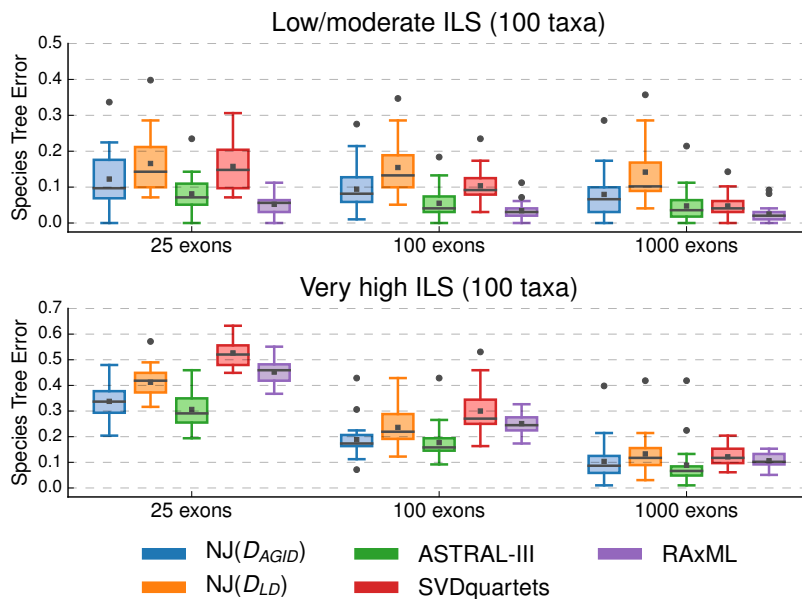

Figure S3: **Comparison of species tree methods for 100-taxon, exon-like datasets.** Species tree estimation error is defined as the normalized Robinson-Foulds (RF) distance between true and estimated species trees. Neighbor Joining (NJ) was run with two different distance matrices; see notation section above for details. Note that gray bars represent medians, gray squares represent means, gray circles represent outliers, box plots are defined by quartiles (extending from the first to the third quartiles), and whiskers extend to plus/minus 1.5 times the interquartile distance (unless greater/less than the maximum/minimum value).



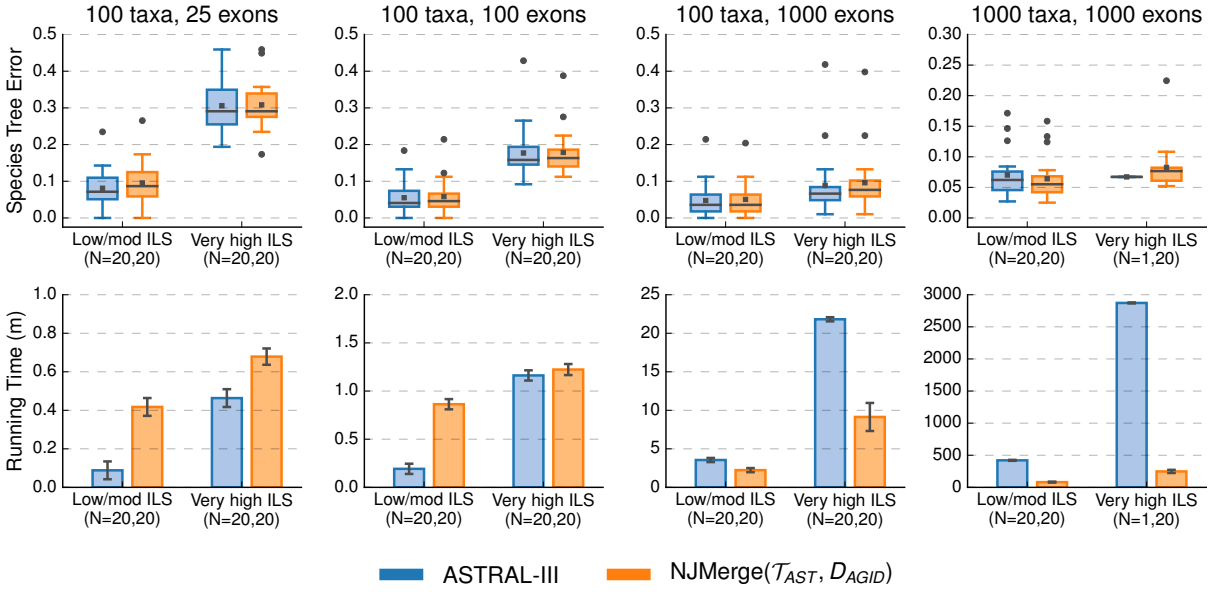

Figure S4: **Comparison of ASTRAL-III and NJMerge given ASTRAL-III constraint trees and AGID matrix for exon-like datasets.** Subplots on top row show species tree estimation error (defined as the normalized RF distance between true and estimated species trees); note that gray bars represent medians, gray squares represent means, gray circles represent outliers, box plots are defined by quartiles (extending from the first to the third quartiles), and whiskers extend to plus/minus 1.5 times the interquartile distance (unless greater/less than the maximum/minimum value). Subplots on bottom row show running time (in minutes); bars represent means and error bars represent standard deviations across replicate datasets. NJMerge running times is for computing the subset trees “in serial”; see Equation (1) in the main text for more information. The numbers of replicates on which the methods completed is shown on the x-axis, e.g.,  $N = X, Y$  indicates that ASTRAL-III completed on  $X$  out of 20 replicates and that NJMerge( $\mathcal{T}_{AST}, D_{LD}$ ) completed on  $Y$  out of 20 replicates.

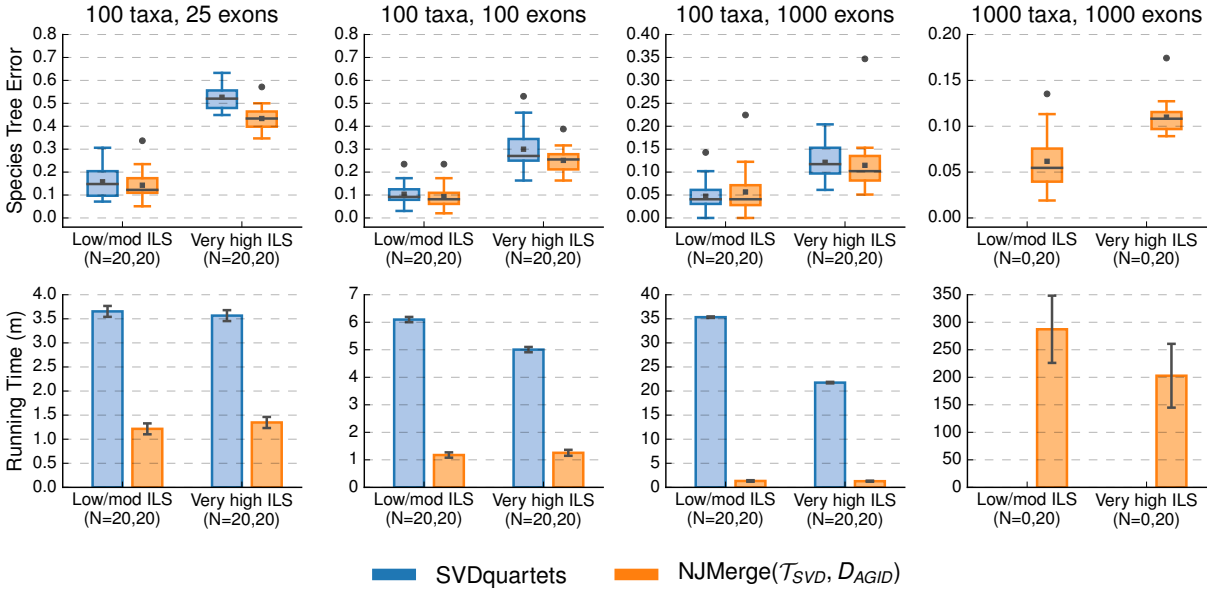

Figure S5: **Comparison of SVDquartets and NJMerge (given SVDquartets constraint trees and AGID matrix) for exon-like datasets.** Subplots on top row show species tree estimation error (defined as the normalized RF distance between true and estimated species trees); note that gray bars represent medians, gray squares represent means, gray circles represent outliers, box plots are defined by quartiles (extending from the first to the third quartiles), and whiskers extend to plus/minus 1.5 times the interquartile distance (unless greater/less than the maximum/minimum value). Subplots on bottom row show running time (in minutes); bars represent means and error bars represent standard deviations across replicate datasets. NJMerge running times is for computing the subset trees “in serial”; see Equation (1) in the main text for more information. The numbers of replicates on which the methods completed is shown on the x-axis, e.g.,  $N = X, Y$  indicates that SVDquartets completed on  $X$  out of 20 replicates and that NJMerge( $\mathcal{T}_{SVD}$ ,  $D_{LD}$ ) completed on  $Y$  out of 20 replicates.

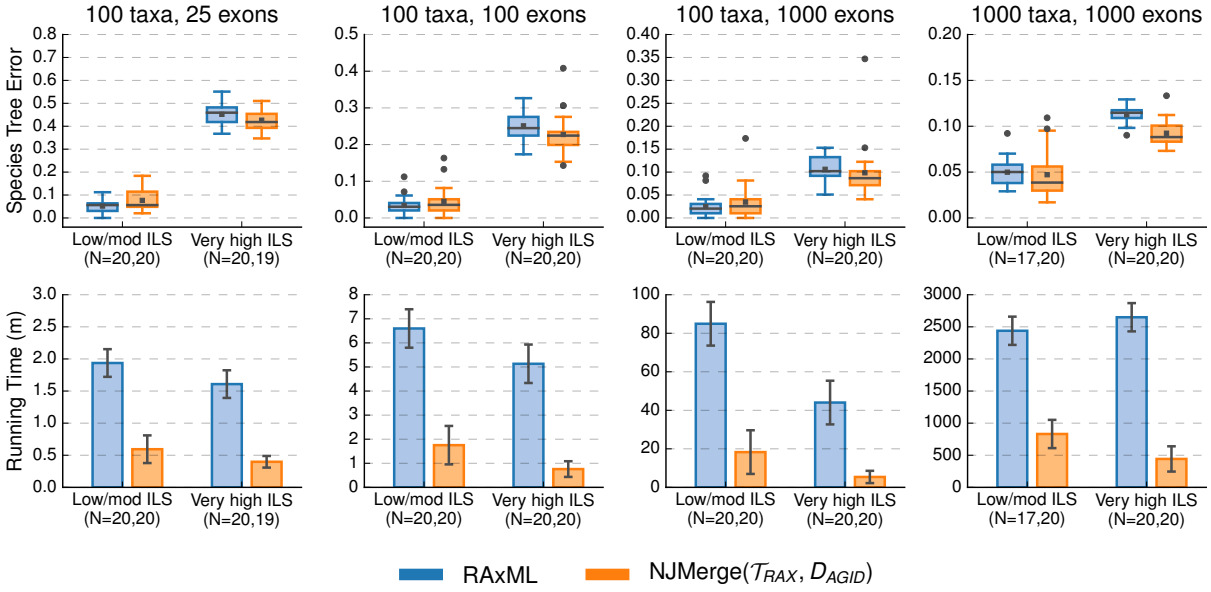

Figure S6: **Comparison of RAxML and NJMerge given RAxML constraint trees and AGID matrix for exon-like datasets.** Subplots on top row show species tree estimation error (defined as the normalized RF distance between true and estimated species trees); note that gray bars represent medians, gray squares represent means, gray circles represent outliers, box plots are defined by quartiles (extending from the first to the third quartiles), and whiskers extend to plus/minus 1.5 times the interquartile distance (unless greater/less than the maximum/minimum value). Subplots on bottom row show running time (in minutes); bars represent means and error bars represent standard deviations across replicate datasets. NJMerge running times is for computing the subset trees “in serial”; see Equation (1) in the main text for more information. The numbers of replicates on which the methods completed is shown on the x-axis, e.g.,  $N = X, Y$  indicates that RAxML completed on  $X$  out of 20 replicates and that NJMerge( $T_{RAX}, D_{LD}$ ) completed on  $Y$  out of 20 replicates.

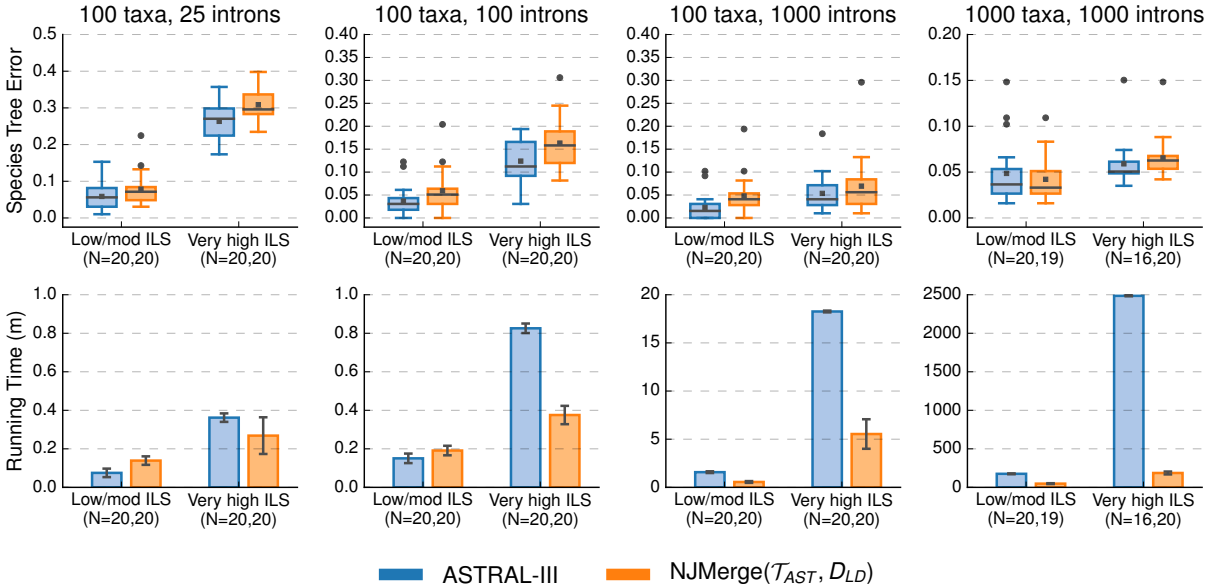

Figure S7: **Comparison of ASTRAL-III and NJMerge given ASTRAL-III constraint trees and log-det distance matrix for intron-like datasets.** Subplots on top row show species tree estimation error (defined as the normalized RF distance between true and estimated species trees); note that gray bars represent medians, gray squares represent means, gray circles represent outliers, box plots are defined by quartiles (extending from the first to the third quartiles), and whiskers extend to plus/minus 1.5 times the interquartile distance (unless greater/less than the maximum/minimum value). Subplots on bottom row show running time (in minutes); bars represent means and error bars represent standard deviations across replicate datasets. NJMerge running times is for computing the subset trees “in serial”; see Equation (1) in the main text for more information. The numbers of replicates on which the methods completed is shown on the x-axis, e.g.,  $N = X, Y$  indicates that ASTRAL-III completed on  $X$  out of 20 replicates and that NJMerge( $\mathcal{T}_{AST}, D_{LD}$ ) completed on  $Y$  out of 20 replicates.

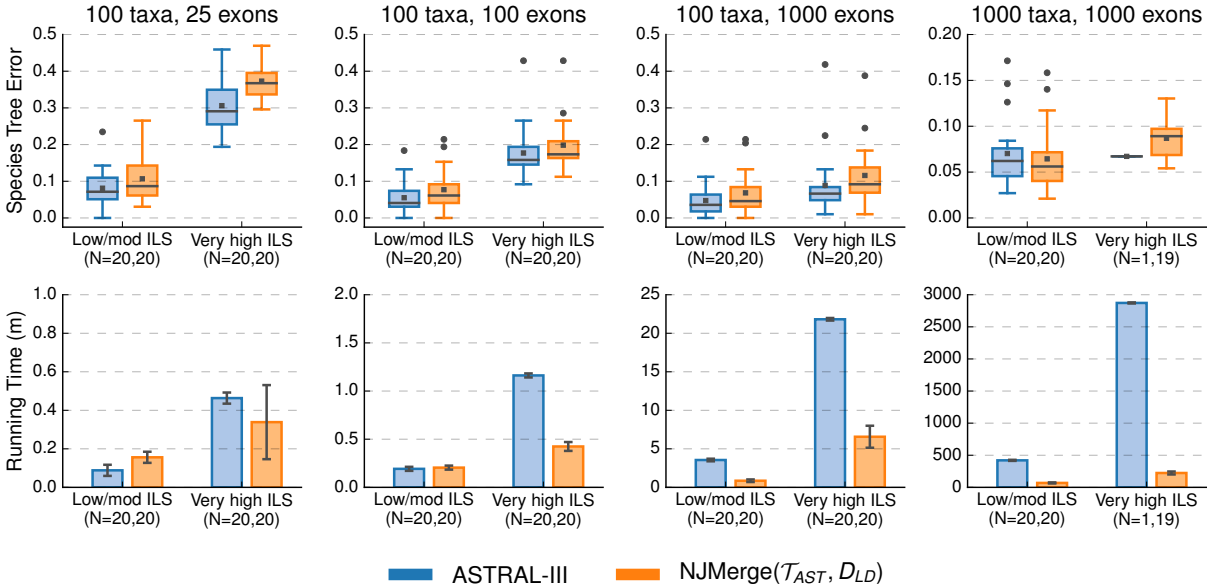

Figure S8: **Comparison of ASTRAL-III and NJMerge given ASTRAL-III constraint trees and log-det distance matrix for exon-like datasets.** Subplots on top row show species tree estimation error (defined as the normalized RF distance between true and estimated species trees); note that gray bars represent medians, gray squares represent means, gray circles represent outliers, box plots are defined by quartiles (extending from the first to the third quartiles), and whiskers extend to plus/minus 1.5 times the interquartile distance (unless greater/less than the maximum/minimum value). Subplots on bottom row show running time (in minutes); bars represent means and error bars represent standard deviations across replicate datasets. NJMerge running times is for computing the subset trees “in serial”; see Equation (1) in the main text for more information. The numbers of replicates on which the methods completed is shown on the x-axis, e.g.,  $N = X, Y$  indicates that ASTRAL-III completed on  $X$  out of 20 replicates and that NJMerge( $\mathcal{T}_{AST}, D_{LD}$ ) completed on  $Y$  out of 20 replicates.

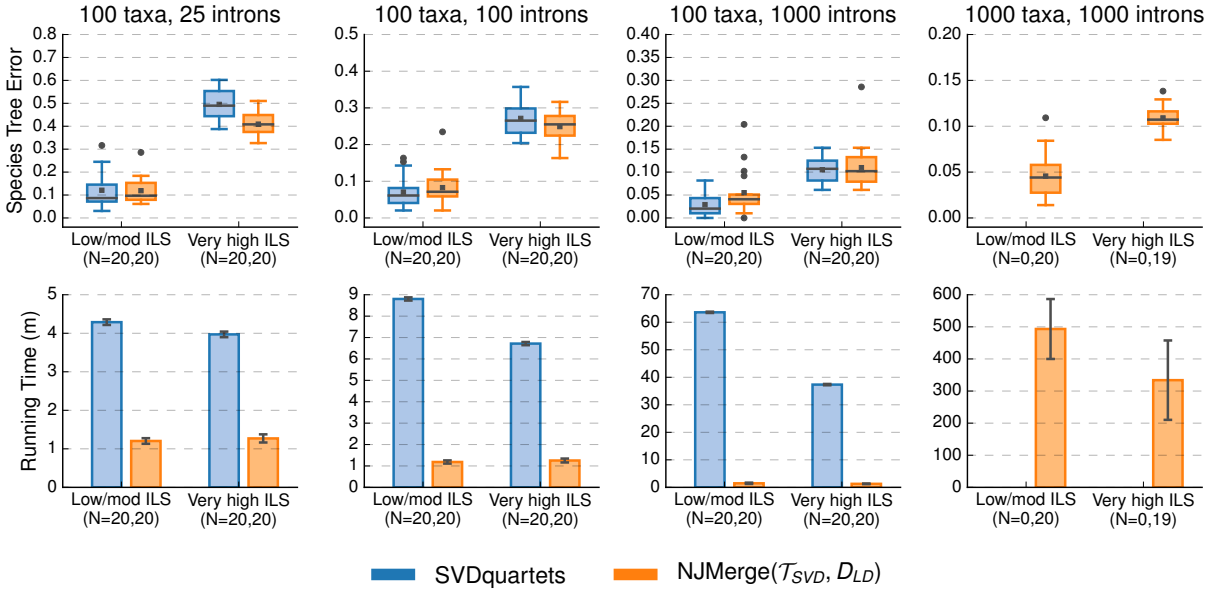

Figure S9: **Comparison of SVDquartets and NJMerge given SVDquartet constraint trees and log-det distance matrix for intron-like datasets.** Subplots on top row show species tree estimation error (defined as the normalized RF distance between true and estimated species trees); note that gray bars represent medians, gray squares represent means, gray circles represent outliers, box plots are defined by quartiles (extending from the first to the third quartiles), and whiskers extend to plus/minus 1.5 times the interquartile distance (unless greater/less than the maximum/minimum value). Subplots on bottom row show running time (in minutes); bars represent means and error bars represent standard deviations across replicate datasets. NJMerge running times is for computing the subset trees “in serial”; see Equation (1) in the main text for more information. The numbers of replicates on which the methods completed is shown on the x-axis, e.g.,  $N = X, Y$  indicates that SVDquartets completed on  $X$  out of 20 replicates and that NJMerge( $T_{SVD}, D_{LD}$ ) completed on  $Y$  out of 20 replicates.

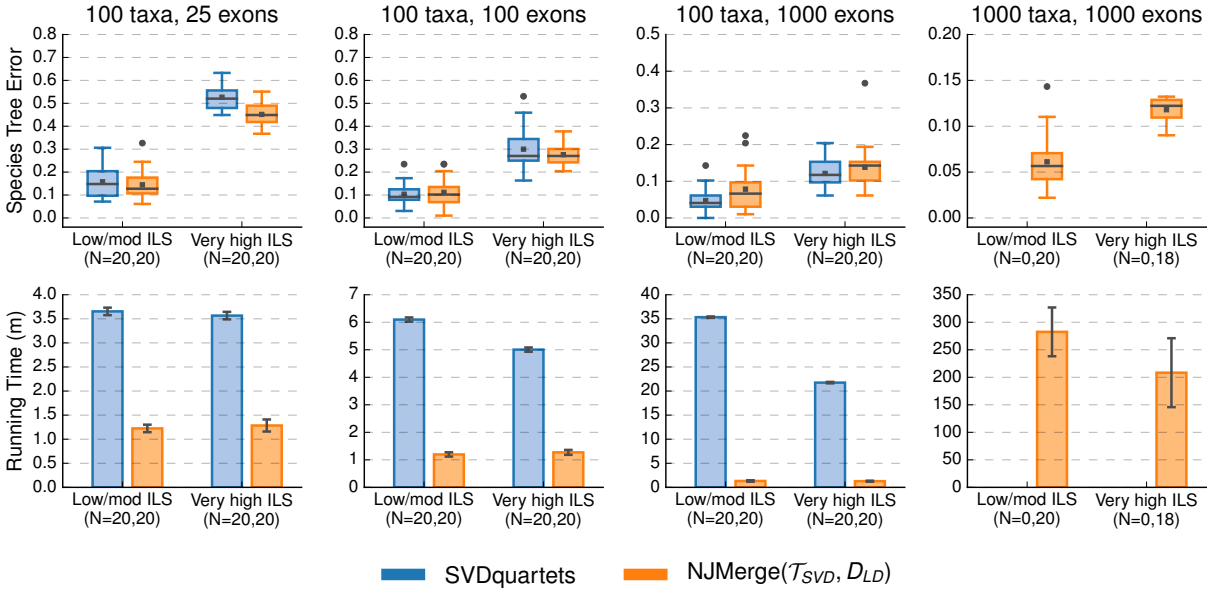

Figure S10: **Comparison of SVDquartets and NJMerge given log-det distance matrix for exon-like datasets.** Subplots on top row show species tree estimation error (defined as the normalized RF distance between true and estimated species trees); note that gray bars represent medians, gray squares represent means, gray circles represent outliers, box plots are defined by quartiles (extending from the first to the third quartiles), and whiskers extend to plus/minus 1.5 times the interquartile distance (unless greater/less than the maximum/minimum value). Subplots on bottom row show running time (in minutes); bars represent means and error bars represent standard deviations across replicate datasets. NJMerge running times is for computing the subset trees “in serial”; see Equation (1) in the main text for more information. The numbers of replicates on which the methods completed is shown on the x-axis, e.g.,  $N = X, Y$  indicates that SVDquartets completed on  $X$  out of 20 replicates and that NJMerge( $\mathcal{T}_{SVD}, D_{LD}$ ) completed on  $Y$  out of 20 replicates.

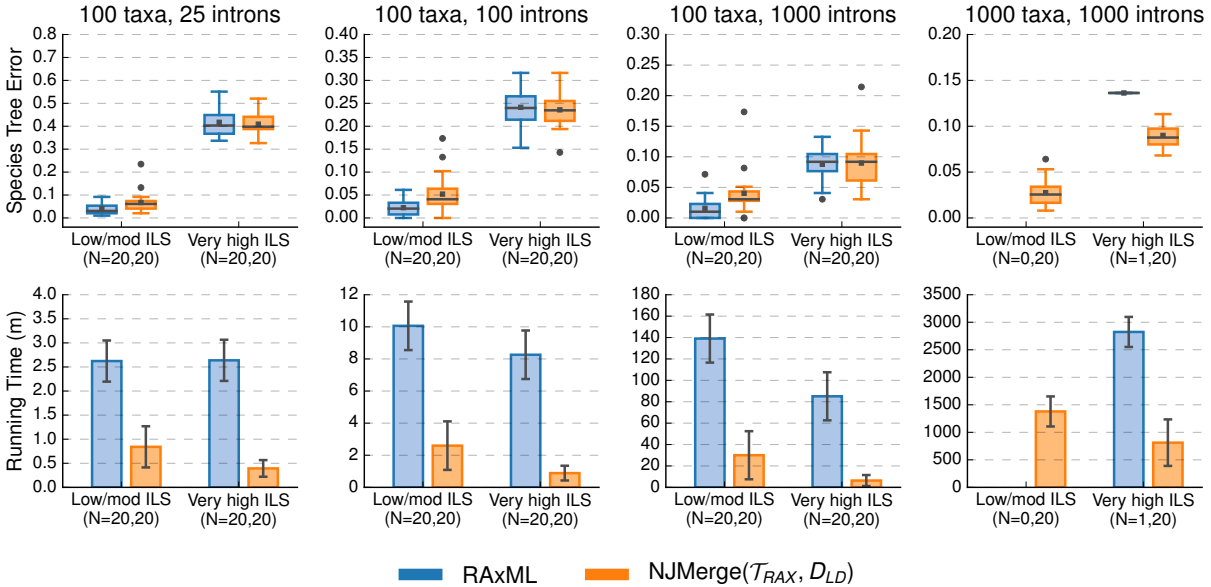

Figure S11: **Comparison of RAxML and NJMerge given RAxML constraint trees and log-det distance matrix for intron-like datasets.** Subplots on top row show species tree estimation error (defined as the normalized RF distance between true and estimated species trees); note that gray bars represent medians, gray squares represent means, gray circles represent outliers, box plots are defined by quartiles (extending from the first to the third quartiles), and whiskers extend to plus/minus 1.5 times the interquartile distance (unless greater/less than the maximum/minimum value). Subplots on bottom row show running time (in minutes); bars represent means and error bars represent standard deviations across replicate datasets. NJMerge running times is for computing the subset trees “in serial”; see Equation (1) in the main text for more information. The numbers of replicates on which the methods completed is shown on the x-axis, e.g.,  $N = X, Y$  indicates that RAxML completed on  $X$  out of 20 replicates and that NJMerge( $T_{RAX}, D_{LD}$ ) completed on  $Y$  out of 20 replicates.



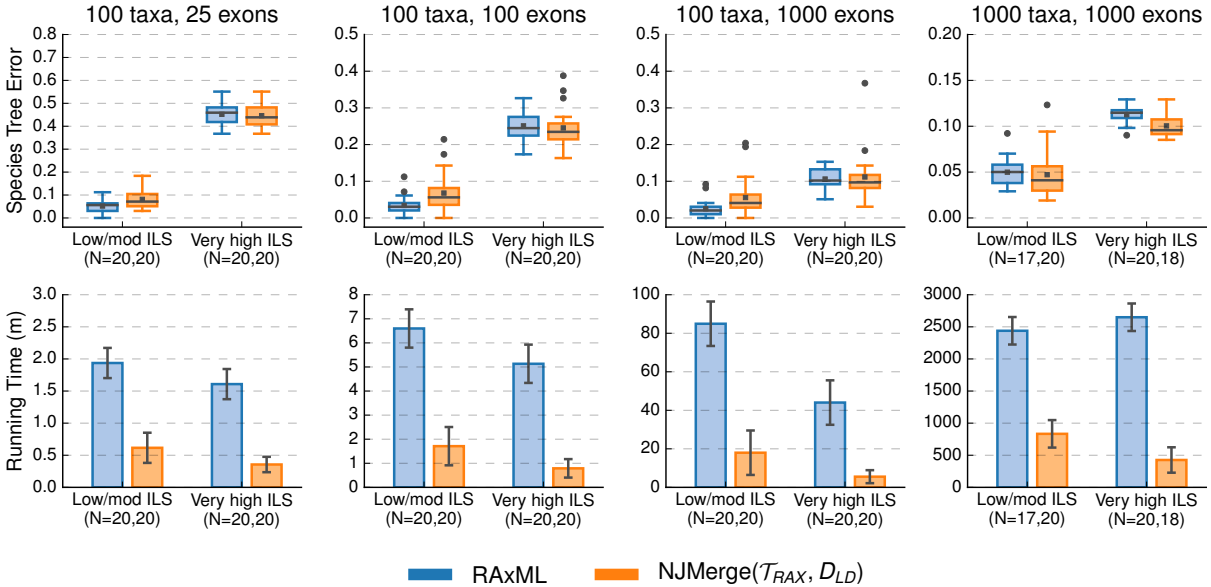

Figure S12: **Comparison of RAxML and NJMerge given RAxML constraint trees and log-det distance matrix for exon-like datasets.** Subplots on top row show species tree estimation error (defined as the normalized RF distance between true and estimated species trees); note that gray bars represent medians, gray squares represent means, gray circles represent outliers, box plots are defined by quartiles (extending from the first to the third quartiles), and whiskers extend to plus/minus 1.5 times the interquartile distance (unless greater/less than the maximum/minimum value). Subplots on bottom row show running time (in minutes); bars represent means and error bars represent standard deviations across replicate datasets. NJMerge running times is for computing the subset trees “in serial”; see Equation (1) in the main text for more information. The numbers of replicates on which the methods completed is shown on the x-axis, e.g.,  $N = X, Y$  indicates that RAxML completed on  $X$  out of 20 replicates and that NJMerge( $T_{RAX}, D_{LD}$ ) completed on  $Y$  out of 20 replicates.

Table S5: **Species tree error for NJMerge given AGID matrix.** Each species tree estimation method (ASTRAL-III, SVDquartets, or RAML) was run on the full dataset or on subsets in order to build constraint trees for NJMerge. We report the average ( $\pm$  standard deviation) species tree estimation error for 1) the tree produced by running species tree method  $M$  on the full set of species (all 100 or all 1000 taxa), 2) the tree produced by running species tree method  $M$  on subsets of species to produce  $\mathcal{T}_M$ , 3) the tree produced by running NJ( $D_{AGID}$ ), and 4) running NJMerge( $\mathcal{T}_M, D_{AGID}$ ). Species tree estimation error (defined as normalized RF distance between the true and the estimated species tree) was averaged across 20 replicate datasets, unless the number of replicate datasets is otherwise noted in parentheses. When methods were run on subsets, species tree estimation error was averaged across all subsets and all replicate datasets. Note that the number of taxa in the subset trees was less than 30 for the 100-taxon datasets and less than 120 for the 1000-taxon datasets.

| # Taxa                 | # Genes | Species Tree Height | Data Type | $M$ on full Full | $M$ on Subset | NJ( $D_{AGID}$ ) | NJMerge( $\mathcal{T}_M, D_{AGID}$ ) |
|------------------------|---------|---------------------|-----------|------------------|---------------|------------------|--------------------------------------|
| <i>M = ASTRAL-III</i>  |         |                     |           |                  |               |                  |                                      |
| 100                    | 25      | 10M                 | exon      | 0.08             | 0.07          | 0.12             | 0.10                                 |
| 100                    | 25      | 10M                 | intron    | 0.06             | 0.05          | 0.07             | 0.06                                 |
| 100                    | 25      | 500K                | exon      | 0.31             | 0.25          | 0.34             | 0.31                                 |
| 100                    | 25      | 500K                | intron    | 0.26             | 0.20          | 0.30             | 0.26                                 |
| 100                    | 100     | 10M                 | exon      | 0.06             | 0.04          | 0.09             | 0.06                                 |
| 100                    | 100     | 10M                 | intron    | 0.04             | 0.03          | 0.05             | 0.04                                 |
| 100                    | 100     | 500K                | exon      | 0.18             | 0.12          | 0.19             | 0.18                                 |
| 100                    | 100     | 500K                | intron    | 0.12             | 0.09          | 0.14             | 0.13                                 |
| 100                    | 1000    | 10M                 | exon      | 0.05             | 0.03          | 0.08             | 0.05                                 |
| 100                    | 1000    | 10M                 | intron    | 0.02             | 0.02          | 0.04             | 0.03                                 |
| 100                    | 1000    | 500K                | exon      | 0.09             | 0.06          | 0.10             | 0.10                                 |
| 100                    | 1000    | 500K                | intron    | 0.05             | 0.04          | 0.06             | 0.06                                 |
| 1000                   | 1000    | 10M                 | exon      | 0.07             | 0.04          | 0.14             | 0.06                                 |
| 1000                   | 1000    | 10M                 | intron    | 0.05             | 0.03          | 0.11             | 0.05                                 |
| 1000                   | 1000    | 500K                | exon      | 0.07 (1)         | 0.07          | 0.09             | 0.08                                 |
| 1000                   | 1000    | 500K                | intron    | 0.06 (16)        | 0.05          | 0.07             | 0.06                                 |
| <i>M = SVDquartets</i> |         |                     |           |                  |               |                  |                                      |
| 100                    | 25      | 10M                 | exon      | 0.16             | 0.12          | 0.12             | 0.14                                 |
| 100                    | 25      | 10M                 | intron    | 0.12             | 0.09          | 0.07             | 0.10                                 |
| 100                    | 25      | 500K                | exon      | 0.53             | 0.38          | 0.34             | 0.43                                 |
| 100                    | 25      | 500K                | intron    | 0.50             | 0.34          | 0.30             | 0.39                                 |
| 100                    | 100     | 10M                 | exon      | 0.10             | 0.08          | 0.09             | 0.09                                 |
| 100                    | 100     | 10M                 | intron    | 0.07             | 0.06          | 0.05             | 0.07                                 |
| 100                    | 100     | 500K                | exon      | 0.30             | 0.21          | 0.19             | 0.25                                 |
| 100                    | 100     | 500K                | intron    | 0.27             | 0.20          | 0.14             | 0.23                                 |
| 100                    | 1000    | 10M                 | exon      | 0.05             | 0.04          | 0.08             | 0.06                                 |
| 100                    | 1000    | 10M                 | intron    | 0.03             | 0.03          | 0.04             | 0.03                                 |
| 100                    | 1000    | 500K                | exon      | 0.12             | 0.08          | 0.10             | 0.11                                 |
| 100                    | 1000    | 500K                | intron    | 0.11             | 0.08          | 0.06             | 0.10                                 |
| 1000                   | 1000    | 10M                 | exon      | NA (0)           | 0.04          | 0.14             | 0.06                                 |
| 1000                   | 1000    | 10M                 | intron    | NA (0)           | 0.03          | 0.11             | 0.05                                 |
| 1000                   | 1000    | 500K                | exon      | NA (0)           | 0.10          | 0.09             | 0.11                                 |
| 1000                   | 1000    | 500K                | intron    | NA (0)           | 0.09          | 0.07             | 0.10                                 |
| <i>M = RAxML</i>       |         |                     |           |                  |               |                  |                                      |
| 100                    | 25      | 10M                 | exon      | 0.05             | 0.04          | 0.12             | 0.08                                 |
| 100                    | 25      | 10M                 | intron    | 0.04             | 0.03          | 0.07             | 0.05                                 |
| 100                    | 25      | 500K                | exon      | 0.45             | 0.38          | 0.34             | 0.43 (19)                            |
| 100                    | 25      | 500K                | intron    | 0.42             | 0.34          | 0.30             | 0.39                                 |
| 100                    | 100     | 10M                 | exon      | 0.03             | 0.02          | 0.09             | 0.05                                 |
| 100                    | 100     | 10M                 | intron    | 0.02             | 0.02          | 0.05             | 0.03                                 |
| 100                    | 100     | 500K                | exon      | 0.25             | 0.18          | 0.19             | 0.23                                 |
| 100                    | 100     | 500K                | intron    | 0.24             | 0.18          | 0.14             | 0.21                                 |
| 100                    | 1000    | 10M                 | exon      | 0.02             | 0.01          | 0.08             | 0.03                                 |
| 100                    | 1000    | 10M                 | intron    | 0.02             | 0.01          | 0.04             | 0.02                                 |
| 100                    | 1000    | 500K                | exon      | 0.11             | 0.06          | 0.10             | 0.10                                 |
| 100                    | 1000    | 500K                | intron    | 0.09             | 0.06          | 0.06             | 0.08                                 |
| 1000                   | 1000    | 10M                 | exon      | 0.05 (17)        | 0.02          | 0.14             | 0.05                                 |
| 1000                   | 1000    | 10M                 | intron    | NA (0)           | 0.01          | 0.11             | 0.03                                 |
| 1000                   | 1000    | 500K                | exon      | 0.11             | 0.08          | 0.09             | 0.09                                 |
| 1000                   | 1000    | 500K                | intron    | 0.14 (1)         | 0.08          | 0.07             | 0.08                                 |

Table S6: **Species tree error for NJMerge given log-det distance matrix.** Each species tree estimation method (ASTRAL-III, SVDquartets, or RAML) was run on the full dataset or on subsets in order to build constraint trees for NJMerge. We report the average ( $\pm$  standard deviation) species tree estimation error for 1) the tree produced by running species tree method  $M$  on the full set of species (all 100 or all 1000 taxa), 2) the tree produced by running species tree method  $M$  on subsets of species to produce  $\mathcal{T}_M$ , 3) the tree produced by running NJ( $D_{LD}$ ), and 4) running NJMerge( $\mathcal{T}_M, D_{LD}$ ). Species tree estimation error (defined as normalized RF distance between the true and the estimated species tree) was averaged across 20 replicate datasets, unless the number of replicate datasets is otherwise noted in parentheses. When methods were run on subsets, species tree estimation error was averaged across all subsets and all replicate datasets. Note that the number of taxa in the subset trees was less than 30 for the 100-taxon datasets and less than 120 for the 1000-taxon datasets.

| # Taxa                 | # Genes | Species Tree Height | Data Type | $M$ on full dataset | $M$ on subsets | NJ( $D_{LD}$ ) | NJMerge( $\mathcal{T}_M, D_{LD}$ ) |
|------------------------|---------|---------------------|-----------|---------------------|----------------|----------------|------------------------------------|
| <i>M = ASTRAL-III</i>  |         |                     |           |                     |                |                |                                    |
| 100                    | 25      | 10M                 | exon      | 0.08                | 0.06           | 0.17           | 0.11                               |
| 100                    | 25      | 10M                 | intron    | 0.06                | 0.04           | 0.14           | 0.08                               |
| 100                    | 25      | 500K                | exon      | 0.31                | 0.26           | 0.41           | 0.37                               |
| 100                    | 25      | 500K                | intron    | 0.26                | 0.19           | 0.36           | 0.31                               |
| 100                    | 100     | 10M                 | exon      | 0.06                | 0.04           | 0.15           | 0.08                               |
| 100                    | 100     | 10M                 | intron    | 0.04                | 0.03           | 0.12           | 0.06                               |
| 100                    | 100     | 500K                | exon      | 0.18                | 0.13           | 0.24           | 0.20                               |
| 100                    | 100     | 500K                | intron    | 0.12                | 0.10           | 0.21           | 0.16                               |
| 100                    | 1000    | 10M                 | exon      | 0.05                | 0.03           | 0.14           | 0.07                               |
| 100                    | 1000    | 10M                 | intron    | 0.02                | 0.02           | 0.11           | 0.05                               |
| 100                    | 1000    | 500K                | exon      | 0.09                | 0.06           | 0.13           | 0.12                               |
| 100                    | 1000    | 500K                | intron    | 0.05                | 0.04           | 0.09           | 0.07                               |
| 1000                   | 1000    | 10M                 | exon      | 0.07                | 0.04           | 0.14           | 0.06                               |
| 1000                   | 1000    | 10M                 | intron    | 0.05                | 0.03           | 0.11           | 0.04 (19)                          |
| 1000                   | 1000    | 500K                | exon      | 0.07 (1)            | 0.07           | 0.10           | 0.09 (19)                          |
| 1000                   | 1000    | 500K                | intron    | 0.06 (16)           | 0.05           | 0.07           | 0.07                               |
| <i>M = SVDquartets</i> |         |                     |           |                     |                |                |                                    |
| 100                    | 25      | 10M                 | exon      | 0.16                | 0.11           | 0.17           | 0.14                               |
| 100                    | 25      | 10M                 | intron    | 0.12                | 0.09           | 0.14           | 0.12                               |
| 100                    | 25      | 500K                | exon      | 0.53                | 0.36           | 0.41           | 0.45                               |
| 100                    | 25      | 500K                | intron    | 0.50                | 0.32           | 0.36           | 0.41                               |
| 100                    | 100     | 10M                 | exon      | 0.10                | 0.07           | 0.15           | 0.11                               |
| 100                    | 100     | 10M                 | intron    | 0.07                | 0.05           | 0.12           | 0.08                               |
| 100                    | 100     | 500K                | exon      | 0.30                | 0.22           | 0.24           | 0.28                               |
| 100                    | 100     | 500K                | intron    | 0.27                | 0.19           | 0.21           | 0.25                               |
| 100                    | 1000    | 10M                 | exon      | 0.05                | 0.04           | 0.14           | 0.08                               |
| 100                    | 1000    | 10M                 | intron    | 0.03                | 0.03           | 0.11           | 0.06                               |
| 100                    | 1000    | 500K                | exon      | 0.12                | 0.09           | 0.13           | 0.14                               |
| 100                    | 1000    | 500K                | intron    | 0.11                | 0.08           | 0.09           | 0.11                               |
| 1000                   | 1000    | 10M                 | exon      | NA (0)              | 0.04           | 0.14           | 0.06                               |
| 1000                   | 1000    | 10M                 | intron    | NA (0)              | 0.03           | 0.11           | 0.05                               |
| 1000                   | 1000    | 500K                | exon      | NA (0)              | 0.10           | 0.10           | 0.12 (18)                          |
| 1000                   | 1000    | 500K                | intron    | NA (0)              | 0.09           | 0.07           | 0.11 (19)                          |
| <i>M = RAxML</i>       |         |                     |           |                     |                |                |                                    |
| 100                    | 25      | 10M                 | exon      | 0.05                | 0.04           | 0.17           | 0.08                               |
| 100                    | 25      | 10M                 | intron    | 0.04                | 0.03           | 0.14           | 0.07                               |
| 100                    | 25      | 500K                | exon      | 0.45                | 0.34           | 0.41           | 0.45                               |
| 100                    | 25      | 500K                | intron    | 0.42                | 0.32           | 0.36           | 0.41                               |
| 100                    | 100     | 10M                 | exon      | 0.03                | 0.02           | 0.15           | 0.07                               |
| 100                    | 100     | 10M                 | intron    | 0.02                | 0.02           | 0.12           | 0.05                               |
| 100                    | 100     | 500K                | exon      | 0.25                | 0.19           | 0.24           | 0.25                               |
| 100                    | 100     | 500K                | intron    | 0.24                | 0.18           | 0.21           | 0.24                               |
| 100                    | 1000    | 10M                 | exon      | 0.02                | 0.01           | 0.14           | 0.06                               |
| 100                    | 1000    | 10M                 | intron    | 0.02                | 0.01           | 0.11           | 0.04                               |
| 100                    | 1000    | 500K                | exon      | 0.11                | 0.06           | 0.13           | 0.11                               |
| 100                    | 1000    | 500K                | intron    | 0.09                | 0.06           | 0.09           | 0.09                               |
| 1000                   | 1000    | 10M                 | exon      | 0.05 (17)           | 0.02           | 0.14           | 0.05                               |
| 1000                   | 1000    | 10M                 | intron    | NA (0)              | 0.01           | 0.11           | 0.03                               |
| 1000                   | 1000    | 500K                | exon      | 0.11                | 0.08           | 0.10           | 0.10 (18)                          |
| 1000                   | 1000    | 500K                | intron    | 0.14 (1)            | 0.07           | 0.07           | 0.09                               |

Table S7: **Running times for NJMerge given AGID matrix.** Each species tree estimation method  $M$  was run on the full dataset (all 100 or all 1000 taxa) or on subsets in order to build a set  $\mathcal{T}_M$  of constraint trees for NJMerge. We report the average running time ( $\pm$  the standard deviation) in seconds across 20 replicate datasets, unless the number of replicate datasets is otherwise noted in parentheses. When methods were run on subsets, the time was measured per subset, and then average was taken across all subsets for all replicate datasets. Note that the 100-taxon datasets were decomposed into 4-6 subsets with a maximum subset size of 30 taxa and that the 1000-taxon datasets were decomposed into 10-15 subsets with a maximum subset size of 120 taxa.

| # Taxa                 | # Genes | Species Tree Height | Data Type | $M$ on full dataset (s) | $M$ on subsets (s) | NJMerge( $\mathcal{T}_M, D_{AGID}$ ) (s) |
|------------------------|---------|---------------------|-----------|-------------------------|--------------------|------------------------------------------|
| <i>M = ASTRAL-III</i>  |         |                     |           |                         |                    |                                          |
| 100                    | 25      | 10M                 | exon      | 5 ± 1                   | 4 ± 1              | 5 ± 2                                    |
| 100                    | 25      | 10M                 | intron    | 5 ± 1                   | 4 ± 1              | 5 ± 1                                    |
| 100                    | 25      | 500K                | exon      | 28 ± 6                  | 8 ± 2              | 5 ± 1                                    |
| 100                    | 25      | 500K                | intron    | 22 ± 6                  | 7 ± 2              | 6 ± 2                                    |
| 100                    | 100     | 10M                 | exon      | 12 ± 2                  | 10 ± 2             | 5 ± 1                                    |
| 100                    | 100     | 10M                 | intron    | 9 ± 1                   | 9 ± 2              | 5 ± 1                                    |
| 100                    | 100     | 500K                | exon      | 70 ± 20                 | 15 ± 3             | 5 ± 1                                    |
| 100                    | 100     | 500K                | intron    | 50 ± 12                 | 14 ± 3             | 5 ± 1                                    |
| 100                    | 1000    | 10M                 | exon      | 213 ± 65                | 28 ± 10            | 5 ± 1                                    |
| 100                    | 1000    | 10M                 | intron    | 95 ± 48                 | 21 ± 5             | 5 ± 1                                    |
| 100                    | 1000    | 500K                | exon      | 1309 ± 206              | 121 ± 56           | 5 ± 1                                    |
| 100                    | 1000    | 500K                | intron    | 1096 ± 193              | 103 ± 57           | 5 ± 1                                    |
| 1000                   | 1000    | 10M                 | exon      | 25231 ± 5154            | 239 ± 119          | 1939 ± 66                                |
| 1000                   | 1000    | 10M                 | intron    | 10545 ± 3823            | 126 ± 68           | 1939 ± 74                                |
| 1000                   | 1000    | 500K                | exon      | 172346 ± 0 (1)          | 1073 ± 529         | 1950 ± 283                               |
| 1000                   | 1000    | 500K                | intron    | 149146 ± 14657 (16)     | 907 ± 394          | 1879 ± 24                                |
| <i>M = SVDquartets</i> |         |                     |           |                         |                    |                                          |
| 100                    | 25      | 10M                 | exon      | 219 ± 20                | 15 ± 5             | 6 ± 2                                    |
| 100                    | 25      | 10M                 | intron    | 257 ± 28                | 15 ± 5             | 5 ± 2                                    |
| 100                    | 25      | 500K                | exon      | 214 ± 18                | 17 ± 5             | 9 ± 6                                    |
| 100                    | 25      | 500K                | intron    | 238 ± 25                | 15 ± 5             | 8 ± 4                                    |
| 100                    | 100     | 10M                 | exon      | 366 ± 47                | 14 ± 5             | 5 ± 1                                    |
| 100                    | 100     | 10M                 | intron    | 528 ± 81                | 14 ± 5             | 6 ± 2                                    |
| 100                    | 100     | 500K                | exon      | 300 ± 45                | 15 ± 6             | 6 ± 2                                    |
| 100                    | 100     | 500K                | intron    | 403 ± 89                | 15 ± 6             | 6 ± 2                                    |
| 100                    | 1000    | 10M                 | exon      | 2120 ± 507              | 16 ± 7             | 5 ± 2                                    |
| 100                    | 1000    | 10M                 | intron    | 3817 ± 821              | 19 ± 9             | 5 ± 2                                    |
| 100                    | 1000    | 500K                | exon      | 1305 ± 356              | 16 ± 6             | 5 ± 2                                    |
| 100                    | 1000    | 500K                | intron    | 2240 ± 806              | 16 ± 6             | 5 ± 2                                    |
| 1000                   | 1000    | 10M                 | exon      | NA ± NA (0)             | 1238 ± 1142        | 2005 ± 124                               |
| 1000                   | 1000    | 10M                 | intron    | NA ± NA (0)             | 2219 ± 2019        | 1999 ± 184                               |
| 1000                   | 1000    | 500K                | exon      | NA ± NA (0)             | 839 ± 803          | 2057 ± 178                               |
| 1000                   | 1000    | 500K                | intron    | NA ± NA (0)             | 1550 ± 1615        | 1975 ± 76                                |
| <i>M = RAxML</i>       |         |                     |           |                         |                    |                                          |
| 100                    | 25      | 10M                 | exon      | 116 ± 33                | 7 ± 5              | 5 ± 2                                    |
| 100                    | 25      | 10M                 | intron    | 157 ± 47                | 10 ± 7             | 5 ± 2                                    |
| 100                    | 25      | 500K                | exon      | 96 ± 40                 | 4 ± 3              | 8 ± 2 (19)                               |
| 100                    | 25      | 500K                | intron    | 158 ± 69                | 4 ± 3              | 8 ± 3                                    |
| 100                    | 100     | 10M                 | exon      | 396 ± 148               | 22 ± 16            | 5 ± 2                                    |
| 100                    | 100     | 10M                 | intron    | 604 ± 177               | 32 ± 25            | 5 ± 1                                    |
| 100                    | 100     | 500K                | exon      | 308 ± 113               | 9 ± 7              | 6 ± 2                                    |
| 100                    | 100     | 500K                | intron    | 496 ± 237               | 10 ± 9             | 5 ± 2                                    |
| 100                    | 1000    | 10M                 | exon      | 5097 ± 1955             | 238 ± 202          | 5 ± 1                                    |
| 100                    | 1000    | 10M                 | intron    | 8343 ± 2611             | 426 ± 401          | 5 ± 1                                    |
| 100                    | 1000    | 500K                | exon      | 2641 ± 1196             | 71 ± 60            | 5 ± 1                                    |
| 100                    | 1000    | 500K                | intron    | 5106 ± 2414             | 83 ± 99            | 5 ± 1                                    |
| 1000                   | 1000    | 10M                 | exon      | 146329 ± 21692 (17)     | 3887 ± 2023        | 2055 ± 165                               |
| 1000                   | 1000    | 10M                 | intron    | NA ± NA (0)             | 6496 ± 3226        | 2010 ± 174                               |
| 1000                   | 1000    | 500K                | exon      | 158973 ± 12955          | 2037 ± 1554        | 2006 ± 179                               |
| 1000                   | 1000    | 500K                | intron    | 169440 ± 0 (1)          | 3976 ± 3203        | 1933 ± 86                                |

Table S8: **Running times for NJMerge given log-det distance matrix.** Each species tree estimation method  $M$  was run on the full dataset (all 100 or all 1000 taxa) or on subsets in order to build a set  $\mathcal{T}_M$  of constraint trees for NJMerge. We report the average running time ( $\pm$  the standard deviation) in seconds across 20 replicate datasets, unless the number of replicate datasets is otherwise noted in parentheses. When methods were run on subsets, the time was measured per subset, and then average was taken across all subsets for all replicate datasets. Note that the 100-taxon datasets were decomposed into 4-6 subsets with a maximum subset size of 30 taxa and that the 1000-taxon datasets were decomposed into 10-14 subsets with a maximum subset size of 120 taxa.

| # Taxa                 | # Genes | Species Tree Height | Data Type | $M$ on full dataset (s) | $M$ on subsets (s) | NJMerge( $\mathcal{T}_M, D_{LD}$ ) (s) |
|------------------------|---------|---------------------|-----------|-------------------------|--------------------|----------------------------------------|
| <i>M = ASTRAL-III</i>  |         |                     |           |                         |                    |                                        |
| 100                    | 75      | 10M                 | exon      | 5 $\pm$ 1               | 1 $\pm$ 0          | 6 $\pm$ 2                              |
| 100                    | 75      | 10M                 | intron    | 5 $\pm$ 1               | 1 $\pm$ 0          | 5 $\pm$ 1                              |
| 100                    | 75      | 500K                | exon      | 28 $\pm$ 6              | 2 $\pm$ 1          | 13 $\pm$ 11                            |
| 100                    | 75      | 500K                | intron    | 22 $\pm$ 6              | 2 $\pm$ 0          | 9 $\pm$ 6                              |
| 100                    | 300     | 10M                 | exon      | 12 $\pm$ 2              | 2 $\pm$ 0          | 5 $\pm$ 1                              |
| 100                    | 300     | 10M                 | intron    | 9 $\pm$ 1               | 1 $\pm$ 0          | 5 $\pm$ 1                              |
| 100                    | 300     | 500K                | exon      | 70 $\pm$ 20             | 4 $\pm$ 2          | 6 $\pm$ 2                              |
| 100                    | 300     | 500K                | intron    | 50 $\pm$ 12             | 4 $\pm$ 1          | 6 $\pm$ 1                              |
| 100                    | 3000    | 10M                 | exon      | 213 $\pm$ 65            | 10 $\pm$ 5         | 5 $\pm$ 2                              |
| 100                    | 3000    | 10M                 | intron    | 95 $\pm$ 48             | 6 $\pm$ 2          | 5 $\pm$ 1                              |
| 100                    | 3000    | 500K                | exon      | 1309 $\pm$ 206          | 86 $\pm$ 44        | 5 $\pm$ 1                              |
| 100                    | 3000    | 500K                | intron    | 1096 $\pm$ 193          | 73 $\pm$ 40        | 5 $\pm$ 1                              |
| 1000                   | 3000    | 10M                 | exon      | 25231 $\pm$ 5154        | 166 $\pm$ 80       | 2117 $\pm$ 309                         |
| 1000                   | 3000    | 10M                 | intron    | 10545 $\pm$ 3823        | 75 $\pm$ 45        | 2004 $\pm$ 123 (19)                    |
| 1000                   | 3000    | 500K                | exon      | 172346 $\pm$ 0 (1)      | 945 $\pm$ 482      | 2126 $\pm$ 343 (19)                    |
| 1000                   | 3000    | 500K                | intron    | 149146 $\pm$ 14657 (16) | 773 $\pm$ 364      | 1991 $\pm$ 128                         |
| <i>M = SVDquartets</i> |         |                     |           |                         |                    |                                        |
| 100                    | 75      | 10M                 | exon      | 219 $\pm$ 20            | 16 $\pm$ 5         | 5 $\pm$ 2                              |
| 100                    | 75      | 10M                 | intron    | 257 $\pm$ 28            | 15 $\pm$ 5         | 5 $\pm$ 2                              |
| 100                    | 75      | 500K                | exon      | 214 $\pm$ 18            | 15 $\pm$ 6         | 7 $\pm$ 3                              |
| 100                    | 75      | 500K                | intron    | 238 $\pm$ 25            | 15 $\pm$ 5         | 7 $\pm$ 3                              |
| 100                    | 300     | 10M                 | exon      | 366 $\pm$ 47            | 15 $\pm$ 5         | 5 $\pm$ 1                              |
| 100                    | 300     | 10M                 | intron    | 528 $\pm$ 81            | 14 $\pm$ 5         | 5 $\pm$ 1                              |
| 100                    | 300     | 500K                | exon      | 300 $\pm$ 45            | 16 $\pm$ 5         | 6 $\pm$ 2                              |
| 100                    | 300     | 500K                | intron    | 403 $\pm$ 89            | 15 $\pm$ 5         | 6 $\pm$ 2                              |
| 100                    | 3000    | 10M                 | exon      | 2120 $\pm$ 507          | 16 $\pm$ 7         | 5 $\pm$ 1                              |
| 100                    | 3000    | 10M                 | intron    | 3817 $\pm$ 821          | 18 $\pm$ 9         | 5 $\pm$ 1                              |
| 100                    | 3000    | 500K                | exon      | 1305 $\pm$ 356          | 16 $\pm$ 6         | 5 $\pm$ 1                              |
| 100                    | 3000    | 500K                | intron    | 2240 $\pm$ 806          | 16 $\pm$ 6         | 5 $\pm$ 1                              |
| 1000                   | 3000    | 10M                 | exon      | NA $\pm$ NA (0)         | 1225 $\pm$ 1044    | 2064 $\pm$ 324                         |
| 1000                   | 3000    | 10M                 | intron    | NA $\pm$ NA (0)         | 2288 $\pm$ 2003    | 2022 $\pm$ 202                         |
| 1000                   | 3000    | 500K                | exon      | NA $\pm$ NA (0)         | 858 $\pm$ 845      | 2283 $\pm$ 457 (18)                    |
| 1000                   | 3000    | 500K                | intron    | NA $\pm$ NA (0)         | 1459 $\pm$ 1514    | 2081 $\pm$ 216 (19)                    |
| <i>M = RAxML</i>       |         |                     |           |                         |                    |                                        |
| 100                    | 75      | 10M                 | exon      | 116 $\pm$ 33            | 7 $\pm$ 5          | 5 $\pm$ 1                              |
| 100                    | 75      | 10M                 | intron    | 157 $\pm$ 47            | 10 $\pm$ 8         | 5 $\pm$ 1                              |
| 100                    | 75      | 500K                | exon      | 96 $\pm$ 40             | 3 $\pm$ 2          | 7 $\pm$ 4                              |
| 100                    | 75      | 500K                | intron    | 158 $\pm$ 69            | 4 $\pm$ 4          | 6 $\pm$ 1                              |
| 100                    | 300     | 10M                 | exon      | 396 $\pm$ 148           | 22 $\pm$ 15        | 5 $\pm$ 1                              |
| 100                    | 300     | 10M                 | intron    | 604 $\pm$ 177           | 32 $\pm$ 25        | 5 $\pm$ 1                              |
| 100                    | 300     | 500K                | exon      | 308 $\pm$ 113           | 9 $\pm$ 7          | 6 $\pm$ 1                              |
| 100                    | 300     | 500K                | intron    | 496 $\pm$ 237           | 11 $\pm$ 10        | 6 $\pm$ 2                              |
| 100                    | 3000    | 10M                 | exon      | 5097 $\pm$ 1955         | 231 $\pm$ 201      | 5 $\pm$ 2                              |
| 100                    | 3000    | 10M                 | intron    | 8343 $\pm$ 2611         | 390 $\pm$ 366      | 5 $\pm$ 2                              |
| 100                    | 3000    | 500K                | exon      | 2641 $\pm$ 1196         | 73 $\pm$ 63        | 5 $\pm$ 2                              |
| 100                    | 3000    | 500K                | intron    | 5106 $\pm$ 2414         | 84 $\pm$ 96        | 5 $\pm$ 2                              |
| 1000                   | 3000    | 10M                 | exon      | 146329 $\pm$ 21692 (17) | 3935 $\pm$ 1945    | 2200 $\pm$ 485                         |
| 1000                   | 3000    | 10M                 | intron    | NA $\pm$ NA (0)         | 6697 $\pm$ 3093    | 2070 $\pm$ 232                         |
| 1000                   | 3000    | 500K                | exon      | 158973 $\pm$ 12955      | 2022 $\pm$ 1463    | 2076 $\pm$ 200 (18)                    |
| 1000                   | 3000    | 500K                | intron    | 169440 $\pm$ 0 (1)      | 3905 $\pm$ 3174    | 2259 $\pm$ 1164                        |

## References

- [1] E. S. Allman, J. H. Degnan, and J. A. Rhodes. Species Tree Inference from Gene Splits by Unrooted STAR Methods. *IEEE/ACM Transactions on Computational Biology and Bioinformatics*, 15(1):337–342, 2018.
- [2] E. S. Allman, C. Long, and J. A. Rhodes. Species tree inference from genomic sequences using the log-det distance, 2018. <https://arxiv.org/abs/1806.04974>.
- [3] J. Chifman and L. Kubatko. Quartet Inference from SNP Data Under the Coalescent Model. *Bioinformatics*, 30(23):3317–3324, 2014.
- [4] J. Chifman and L. Kubatko. Identifiability of the unrooted species tree topology under the coalescent model with time-reversible substitution processes, site-specific rate variation, and invariable sites. *Journal of Theoretical Biology*, 374:35–47, 2015.
- [5] W. Fletcher and Z. Yang. INDELible: A Flexible Simulator of Biological Sequence Evolution. *Molecular Biology and Evolution*, 26(8):1879–1888, 2009.
- [6] E. D. Jarvis, S. Mirarab, et al. Whole-genome analyses resolve early branches in the tree of life of modern birds. *Science*, 346(6215):1320–1331, 2014.
- [7] V. Lefort, R. Desper, and O. Gascuel. FastME 2.0: A Comprehensive, Accurate, and Fast Distance-Based Phylogeny Inference Program. *Molecular Biology and Evolution*, 32(10):2798–2800, 2015.
- [8] L. Liu and L. Yu. Estimating Species Trees from Unrooted Gene Trees. *Systematic Biology*, 60(5):661–667, 2011.
- [9] D. Mallo, L. De Oliveira Martins, and D. Posada. SimPhy : Phylogenomic Simulation of Gene, Locus, and Species Trees. *Systematic Biology*, 65(2):334–344, 2016.
- [10] S. Mirarab, R. Reaz, M. S. Bayzid, T. Zimmermann, M. S. Swenson, and T. Warnow. ASTRAL: genome-scale coalescent-based species tree estimation. *Bioinformatics*, 30(17):i541–i548, 2014.
- [11] S. Mirarab and T. Warnow. ASTRAL-II: coalescent-based species tree estimation with many hundreds of taxa and thousands of genes. *Bioinformatics*, 31(12):i44–i52, 2015.
- [12] E. K. Molloy and T. Warnow. NJMerge: A Generic Technique for Scaling Phylogeny Estimation Methods and Its Application to Species Trees. In M. Blanchette and A. Ouangraoua, editors, *Comparative Genomics. RECOMB-CG 2018. Lecture Notes in Computer Science*, volume 11183. Springer, Cham, 2018.
- [13] M. N. Price, P. S. Dehal, and A. P. Arkin. FastTree 2 - Approximately Maximum-Likelihood Trees for Large Alignments. *PLOS ONE*, 5(3):1–10, 2010.
- [14] D. Robinson and L. Foulds. Comparison of phylogenetic trees. *Mathematical Biosciences*, 53(1):131–147, 1981.
- [15] A. Stamatakis. RAxML version 8: a tool for phylogenetic analysis and post-analysis of large phylogenies. *Bioinformatics*, 30(9):1312–1313, 2014.
- [16] M. Steel. Recovering a tree from the leaf colourations it generates under a Markov model. *Applied Mathematics Letters*, 7(2):19–24, 1994.
- [17] J. Sukumaran and M. T. Holder. DendroPy: a Python library for phylogenetic computing. *Bioinformatics*, 26(12):1569–1571, 2010.
- [18] D. L. Swofford. PAUP\* (\*Phylogenetic Analysis Using PAUP), Versions 4a161 and 4a163, 2018. <http://phylosolutions.com/paup-test/>.

- [19] P. Vachaspati and T. Warnow. ASTRID: Accurate Species TREes from Internode Distances. *BMC Genomics*, 16(10):S3, 2015.
- [20] C. Zhang, M. Rabiee, E. Sayyari, and S. Mirarab. ASTRAL-III: polynomial time species tree reconstruction from partially resolved gene trees. *BMC Bioinformatics*, 19(6):153, 2018.
